1 Short title: Impacts of pesticides and other stressors on taxonomic richness of freshwater animals

2

3 **Combined impact of pesticides and other environmental stressors on taxonomic richness of**  
4 **freshwater animals in irrigation ponds**

5

6 Hiroshi C. Ito<sup>1,2</sup>, Hiroaki Shiraishi<sup>1</sup>, Megumi Nakagawa<sup>1</sup>, and Noriko Takamura<sup>1</sup>

7

8 <sup>1</sup> National Institute for Environmental Studies, 16-2, Onogawa, Tsukuba, Ibaraki 305-8506,

9 Japan

10 <sup>2</sup> Department of Evolutionary Studies of Biosystems, The Graduate University for Advanced

11 Studies (Sokendai), Hayama, Kanagawa 240-0193, Japan

12

13 Corresponding author: Hiroshi C. Ito

14 Email: [hiroshibeetle@gmail.com](mailto:hiroshibeetle@gmail.com)

15 Tel.: +81 29 856 1720

16 Fax: +81 29 856 1720

17

18 **Abstract**

19 Rice paddy irrigation ponds can sustain surprisingly high taxonomic richness and make  
20 significant contributions to regional biodiversity. We evaluated the impacts of pesticides and  
21 other environmental stressors on the taxonomic richness of freshwater animals in 21 irrigation  
22 ponds in Japan. We sampled a wide range of freshwater animals (reptiles, amphibians, fishes,  
23 mollusks, crustaceans, insects, annelids, bryozoans, and sponges) and surveyed environmental  
24 variables related to pesticide contamination, eutrophication, decreased macrophyte coverage,  
25 physical habitat destruction, and invasive alien species. Statistical analyses comprised  
26 contraction of highly correlated environmental variables, best-subset model selection, stepwise  
27 model selection, and permutation tests. Results showed that: (i) probenazole (fungicide) was the  
28 unique significant stressor on fish (i.e., contamination with this compound had a significantly  
29 negative correlation with fish taxonomic richness), (ii) the interaction of BPMC (insecticide; also  
30 known as fenobucarb) and bluegill (invasive alien fish) was a significant stressor on a “large  
31 insect” category (Coleoptera, Ephemeroptera, Hemiptera, Lepidoptera, Odonata, and  
32 Trichoptera), (iii) the interaction of BPMC and concrete bank was a significant stressor on an  
33 “invertebrate” category, (iv) the combined impacts of BPMC and the other stressors on the  
34 invertebrate and large insect categories resulted in an estimated mean loss of taxonomic richness  
35 by 15% and 77%, respectively, in comparison with a hypothetical pond with preferable  
36 conditions.

37

38 Key words: biodiversity; insecticide; BPMC; fenobucarb; fungicide; probenazole; bluegill;  
39 concrete; plant decrease; fish; insect; invertebrate

40

## 41 **Introduction**

42 Freshwater ecosystems provide a broad variety of services, including disturbance regulation,  
43 water regulation, water supply, waste treatment, food production, and recreation [1], some of  
44 which are irreplaceable [2]. Although freshwater habitats contain only 0.01% of the world's  
45 water and cover only 0.8% of the Earth's surface [3], they maintain almost 6% of all described  
46 species and one-third of all vertebrate species [4, 5]. Among the various types of ecosystems,  
47 however, freshwater ecosystems have the highest proportion of species threatened with  
48 extinction [6, 7]. Because the loss of biodiversity tends to exponentially reduce the efficiencies  
49 and temporal stabilities of ecosystem functions [8], the current rapid biodiversity loss in  
50 freshwater ecosystems implies that they are degrading at a critical rate.

51 Major stressors on freshwater biodiversity include overexploitation, water pollution, flow  
52 modification, destruction or degradation of habitat, and invasion by alien species [4, 9]. Pesticide  
53 contamination is a major component of water pollution [10, 11]. Pesticides can have a serious  
54 impact on biodiversity due to their widespread application to reduce target animals, plants, and  
55 fungi in farmlands, which may affect non-target organisms as well. Experimental studies have  
56 shown that pesticide contamination decreases freshwater biodiversity [12]. While pesticide  
57 contamination in the field is known to dramatically change community compositions into those  
58 dominated by pesticide-tolerant species [13-15], only recently has a significant negative  
59 relationship between pesticide concentrations and biodiversity been reported in freshwater  
60 invertebrates [16, 17]. Two issues make it difficult to evaluate pesticides' impacts on freshwater  
61 biodiversity in the field as compared to experimental systems. First, considering the  
62 spatiotemporal scale of pesticide application and residual effects, gathering reliable  
63 measurements of the states of communities and environmental variables at each sampling point

64 is not easy, because many freshwater bodies have continuous inflows and outflows of organisms  
65 and water. Second, freshwater communities in the field are affected by various environmental  
66 variables other than pesticides. Neglecting any of those non-pesticide variables can cause large  
67 uncertainties in the statistical evaluation of pesticides' impacts, if the neglected factor has a  
68 strong effect. Conversely, if we take into account all the environmental variables that have strong  
69 effects, we can reduce the uncertainties not only of pesticides' impacts but also the combined  
70 impacts of pesticides and other environmental stressors.

71 To overcome the first problem, we focused on irrigation ponds for rice cultivation, which are  
72 relatively closed and small systems in comparison with rivers and lakes and thus enable more  
73 reliable measurements of community states and environmental variables. Japan has  
74 approximately 200,000 irrigation ponds, most of which were constructed during the 17th to 19th  
75 centuries [18]. Despite their small size and the high risk of pesticide contamination and other  
76 stressors [19-22], the irrigation ponds can potentially sustain high taxonomic richness and make  
77 significant contributions to regional biodiversity [23-26]. Further, many endangered species  
78 inhabit the irrigation ponds [27]; the ponds function as refuges for various aquatic plants and  
79 wetland animals, because 61.1% of wetlands had already been lost by 2000 in Japan [18]. In this  
80 study, we sampled a wide range of freshwater vertebrates (reptiles, amphibians, and fish) and  
81 macroinvertebrates (mollusks, crustaceans, insects, annelids, and bryozoans) in 21 irrigation  
82 ponds of Hyogo Prefecture, Japan. Kadoya et al. [19] reported that biodiversity of the irrigation  
83 ponds in this region is at great risk of eutrophication, invasion of alien species, and physical  
84 habitat destruction, but the study did not investigate pesticide contamination.

85 To cope with the second problem described above, we surveyed 47 environmental variables  
86 corresponding to various stressors, including pesticide contamination, eutrophication, physical

87 habitat destruction, decreased macrophyte coverage, and invasive alien species. We statistically  
88 analyzed the relationships between taxonomic richness of animals and environmental variables  
89 by means of model selection among multivariate regression models. Numerous explanatory  
90 variables (environmental variables), however, can cause not only a multicollinearity problem but  
91 also extremely heavy calculation for model selection procedures. To handle these difficulties, we  
92 developed a new statistical procedure by combining the contraction of explanatory variables (by  
93 using correlations among them), best-subset model selection, stepwise model selection, and  
94 permutation tests. The developed procedure enabled us to detect previously unknown and  
95 significantly negative effects of two pesticides, probenazole (fungicide) and  
96 (2-butan-2-ylphenyl) N-methylcarbamate (BPMC [fenobucarb]; insecticide), on the taxonomic  
97 richness of the sampled animals and to evaluate the combined impacts of BPMC and other  
98 environmental stressors.

99

## 100 **Sampling and Measurement**

### 101 *Ethics statement*

102 We obtained permits for the survey from each pond manager in conjunction with the Agricultural  
103 and Environmental Affairs Department, Hyogo Prefecture Government. Surveyed ponds did not  
104 involve protected areas and species that required permits for sampling. The sampled invasive  
105 alien species were processed in accordance with the Japanese IAS Act. All native vertebrates  
106 were released into the same water bodies immediately after being measured and weighed.

107

### 108 *Study area*

109 Our study area covers approximately 580 km<sup>2</sup> in southwestern Hyogo Prefecture, Japan

110 (34°49'N, 134°55'E). Predominant land uses are paddy fields, broad-leaved forests, and urban  
111 areas. The study area has a warm climate with a mean annual temperature of 14.4 °C (minimum  
112 3.5 °C in January, maximum 26.4 °C in August) and mean annual precipitation of 1198.3 mm  
113 [19]. We selected 21 ponds to cover all typical land uses around the ponds, with surface areas  
114 ranging from 1935 to 22,163 m<sup>2</sup>, depth ranging from 0.3 to 4.83 m, and elevation ranging from  
115 10 to 130 m a.s.l. None of these 21 ponds had macrophyte overgrowth during the study period.

116

### 117 *Sampling of vertebrates and macroinvertebrates*

118 Sampling was conducted twice at each pond. At the first sampling (19 September to 5 October  
119 2006), a fyke net (double 3-m wings, funnel 3.04 m, height 0.69 m, 4-mm nylon mesh) was set  
120 during daytime, with its two leaders set at the shore and the approximate center of the pond,  
121 respectively. Also, five rectangular bait traps (length 40 cm, height 25 cm, width 25 cm, 4-mm  
122 nylon mesh, mouths on both sides with 6-cm diameter, fish sausages and dried squid for bait)  
123 were set equally spaced along a line from shore to shore passing through the deepest point. The  
124 fyke net and traps were retrieved the following day. The second sampling (14–24 May 2007) was  
125 conducted near the shore with a D-frame dipnet (0.2-mm mesh) by 0.5-m-long discrete sweeps at  
126 3 to 13 representative habitats (areas of floating-leaved plants, emergent plants, and leaf litter),  
127 depending on the pond's habitat diversity. Animals sampled with the fyke net and dipnet were  
128 identified to the lowest possible taxon. At this sampling, bottom surface sediment was collected  
129 three times at the approximate center of each pond with an Ekman–Birge-type sampler (mouth  
130 opening of 150 mm × 150 mm; Rigo, Tokyo, Japan). The collected sediment was washed  
131 through 0.2-mm mesh to eliminate the finer particles, and the samples were preserved in 10%  
132 formalin and identified to the lowest possible taxon under a binocular microscope. If an

133 identified taxon included another identified taxon (e.g., one was a genus and another was species  
134 belonging to that genus), we assumed that they actually belonged to different lowest taxa from  
135 each other. In total, 144 taxa were identified (S1 Table).

136 The identified taxa included four invasive alien species: bluegill, *Lepomis macrochirus*;  
137 black bass, *Micropterus salmoides*; red swamp crayfish, *Procambarus clarkii*; and bullfrog,  
138 *Lithobates catesbeianus*. These organisms are regulated under the country's Invasive Alien  
139 Species Act, meaning they are regarded to have the potential to harm ecosystems in Japan  
140 through predation on and competition with indigenous species  
141 (<https://www.env.go.jp/en/nature/as.html>). To evaluate their impacts as well as those of other  
142 stressors on freshwater animals in the studied ponds, these four invasive species were excluded  
143 and were instead treated as environmental variables that can influence biodiversity. We also  
144 excluded the pest insects *Galerucella nipponensis* and *Elophila interruptalis* collected on the  
145 agricultural crop water shield, *Brasenia schreberi* [28], since their responses to pesticides may be  
146 qualitatively different from those of other, non-pest animals.

147 For the remaining 138 taxa (hereafter, the “all-sampled” category), we counted the number of  
148 taxa in each pond (range, 9 to 59; mean  $\pm$  SD,  $27.8 \pm 10.2$ ). The all-sampled category was  
149 divided into seven subcategories: (1) reptiles, 3 taxa; (2) fishes, 13 taxa; (3) mollusks, 11 taxa;  
150 (4) crustaceans, 7 taxa; (5) large insects (Coleoptera, Ephemeroptera, Hemiptera, Lepidoptera,  
151 Odonata, Trichoptera), 48 taxa; (6) small insects (Diptera), 28 taxa; and (7) annelids (annelids,  
152 bryozoans, and sponges), 28 taxa. We separated the insects into two categories because the  
153 sampled dipterans consisted mainly of Chironomidae (23 of 28 taxa), a family that is known to  
154 be tolerant of water pollution [29], and thus may have a qualitatively different response to  
155 environmental variables than those of other insect orders. We referred to the last category simply

156 as “annelids” because it consisted mainly of annelids (23 of 28 taxa). We counted the number of  
157 taxa for each of these subcategories in each pond (Fig 1, S2 Table). The average frequency of  
158 each animal category was 4.8% for reptiles, 10.9% for fishes, 5.1% for crustaceans, 6.2% for  
159 mollusks, 16.1% for large insects, 33.4% for small insects, and 23.3% for annelids.

160

161 **Fig 1. Taxonomic richness of freshwater animals sampled in the study ponds.** The numbers  
162 atop bars are pond IDs. The large insect category consists of Coleoptera, Ephemeroptera,  
163 Hemiptera, Lepidoptera, Odonata, and Trichoptera. The small insect category consists of  
164 Diptera. The annelid category consists mainly of annelids and contains small fractions of  
165 bryozoans and sponges.

166

### 167 *Environmental variables*

168 For each pond, we measured 37 physicochemical water properties seven times in 2007 (April  
169 23–24, May 28–29, June 18–19, July 17–18, August 13–14, September 3–4, September 25–26).

170 The measured properties were water temperature, pH, total nitrogen, total phosphorus, suspended  
171 solids, chlorophyll *a*, and the concentrations of 31 pesticides (*insecticides*: BPMC, buprofezin,  
172 clothianidin, dinotefuran, fipronil, imidacloprid, malathion, tebufenozide, thiamethoxam;

173 *fungicides*: azoxystrobin, ferimzone, fthalide, urametypr, IBP, isoprothiolane,

174 metominostrobin-E, metominostrobin-Z, probenazole, pyroquilon, thifluzamide, tiadinil, TPN;

175 *herbicides*: bentazone, bromobutide, butachlor, chlomeprop, dymron, mefenacet, oxaziclomefon,

176 pentoxazone, pyriminobac-methyl-E). See S1 Appendix 1 and S3 Table for details of the

177 measurements, and see S4 and S5 Tables for the data. For each pesticide, concentrations lower

178 than the detection limit were replaced with the detection limit concentration. All pesticides



179 except for TPN were detected in at least one pond (S1, S2, and S3 Figs). In the statistical  
180 analysis, for each pond we used the maximum detected concentration among the seven samples  
181 for each of the 30 pesticides detected, and we used the average for each of the other six  
182 environmental variables. We also measured the organic matter content (ignition loss) in each  
183 pond's sediment once (13–15 May 2007) (S1 Appendix 2).

184 At each pond, we also measured the following 10 variables: pond depth, pond area, concrete  
185 bank rate (proportion of pond bank covered by concrete dike), percent coverage of  
186 floating-leaved plants, percent coverage of emergent plants, pond drainage intensity (0: no  
187 drainage, 1: partial drainage, 2: full drainage; see also [30]), and presence of the four invasive  
188 species: bluegill, black bass, red swamp crayfish, and bullfrog (1: found, 0: not found). See S1  
189 Appendix 2 for details of the measurements. The values of the environmental variables are  
190 summarized in S6 and S7 Tables (see S4, S5, and S8 Tables for the data).

191 Among the environmental variables measured, the declines of floating-leaved plant coverage  
192 and that of emergent plant coverage may be stressors on the taxonomic richness of freshwater  
193 animals in the studied ponds. This is because macrophytes in irrigation ponds in the study area  
194 have been decreasing due to urbanization [31], an increase in concrete banks [32], and herbicide  
195 contamination. Some of the studied ponds had high concentrations of two herbicides, butachlor  
196 and pentoxazone (S2 Fig), which were far higher than their acute toxicity levels for the  
197 ecotoxicological bioindicator *Raphidocelis subcapitata* (72-h ErC50, 3.15 µg/L [33] and 0.79  
198 µg/L [34], respectively). The decline of macrophytes can drive decadal change in benthic  
199 invertebrates [35]. To clarify this viewpoint, we transformed the percentages of floating-leaved  
200 plant coverage and emergent plant coverage into the area percentages not covered by these types  
201 of plants, as follows: 100 – (floating-leaved plant coverage) and 100 – (emergent plant

202 coverage), respectively. Hereafter, we refer to these as “F-plant noncoverage” and “E-plant  
203 noncoverage”, respectively.

204 Too shallow water depth causes unstable environments for freshwater animals, which may  
205 result in low biodiversity [36, 37]. Japanese irrigation ponds have been maintained through the  
206 periodic drainage and removal of bottom mud by farmers [30]. But recently the drainage and  
207 mud dredging have tended to be less frequent than in the past, and sometimes ponds are  
208 abandoned because of a decline in rice farming and farmers’ aging [32]. These phenomena  
209 usually induce ponds to become shallower and eventually vanish [38]. Thus, we also transformed  
210 the depth of each pond into a shallowness index = (maximum depth among ponds) – (focal pond  
211 depth).

212 The numbers of observed taxa may have been affected by variation in the number of dipnet  
213 samples among ponds. However, normalization of the observed taxonomic richness by fitting  
214 rarefaction curves [16] was not appropriate for our data, because choices of sampling points and  
215 sampling numbers were both nonrandom; that is, they were designed to cover the existing habitat  
216 diversity with a minimum sampling number in each pond. As an alternative to normalization, we  
217 added the logarithm of dipnet sampling number to the 47 environmental variables, taking into  
218 account that sampling efforts and species numbers tend to show log–log relationships [39]. In  
219 total, 48 environmental variables were used in the statistical analysis.

220

## 221 **Statistical analysis**

222 To identify which of the 48 environmental variables are related to the taxonomic richness (i.e.,  
223 numbers of taxa) of the sampled animals, we conducted model selection among regression  
224 models and permutation tests. The response variables for the regression models were the

225 taxonomic richness of the all-sampled category and seven subcategories (reptiles, fishes,  
226 mollusks, crustaceans, large insects, small insects, and annelids). In addition, we classified taxa  
227 into four more categories, namely large animals (reptiles, fishes, mollusks, crustaceans, and  
228 large insects), small animals (small insects and annelids), vertebrates (reptiles and fishes), and  
229 invertebrates (mollusks, crustaceans, large insects, small insects, and annelids), and analyzed  
230 these as response variables as well. The analysis was conducted with statistical software R  
231 (version 3.4.4) and its packages `glmmML-1.0`, `glmperm-1.0-5`, `spdep-0.7-9`, `pforeach-1.3`, and  
232 `foreach-1.4.4` (organized into R package “contselec,” available from  
233 <https://github.com/yorickuser/contselec>).

234

### 235 ***Contraction of environmental variables***

236 The environmental variables were scaled so that their means and standard deviations became  
237 equal to 0 and 1, respectively. To reduce the amount of calculation needed and to avoid the  
238 multicollinearity problem, environmental variables with high absolute correlations were grouped  
239 together (by choosing 0.52 as the threshold for absolute value of correlation). This operation  
240 reduced the 48 environmental variables to 11 contraction groups. Nine of the groups contained a  
241 single variable: BPMC (insecticide), probenazole (fungicide), shallowness, F-plant noncoverage,  
242 concrete bank, pond drainage, bluegill, red swamp crayfish, and bullfrog; we refer to these as  
243 “real variables.” The remaining two contraction groups were a small group “IBP-Ignition\_loss”  
244 consisting of IBP (fungicide) and ignition loss, and a large group containing the remaining 37  
245 environmental variables. Each of these two groups was represented by its principal component  
246 analysis (PCA) axes so that more than 65% of its total variance was explained by the PCA  
247 scores. For the small group, only the first PCA axis was used (77.1% explained). For the large

248 group, its top four PCA axes (65.5% explained) were used (S2 Appendix 1). We refer to these  
249 five representative variables as “pseudo variables.”

250 Consequently, the 48 uncontracted environmental variables were reduced to 14 contracted  
251 environmental variables, which included 9 real variables and 5 pseudo variables. In this analysis,  
252 we also integrated the effects of pesticides by calculating their toxic units [14, 16]. However, the  
253 integrated toxic units,  $TU_{\max}$  and  $TU_{\text{sum}}$ , both resulted in their belonging to the large contraction  
254 group, such that the effects of pesticides were not clarified.

255

### 256 ***Model selection***

257 We used the 14 contracted environmental variables as the explanatory variables to explain the  
258 response variable, taxonomic richness of a focal animal category. For convenience, all  
259 explanatory variables were scaled to range from 0 to 1. For each of the possible subsets of the 14  
260 explanatory variables, we constructed a Poisson regression mixed model, where any model has at  
261 least one explanatory variable.

262 In each model, the response variables were described by a vector  $\mathbf{y} = (y_1, \dots, y_M)$  of length  
263  $M = 21$  (the number of studied ponds), where  $y_i$  is its value for the  $i$ th pond. Explanatory  
264 variables were described by a set of vectors  $\mathbf{x}_1, \dots, \mathbf{x}_K$  with  $1 \leq K \leq 14$ , each of which was  
265 denoted by  $\mathbf{x}_k = (x_{k,1}, \dots, x_{k,M})$ . We assumed that  $y_i$  follows the Poisson distribution,

$$266 \quad y_i \sim \text{Poisson}(Y_i) \#(1)$$

267 with its mean  $Y_i$  described as

$$268 \quad \ln(Y_i) = \alpha + \sum_{k=1}^K \beta_k x_{k,i} + r_i \#(2)$$

269 where  $\alpha$  is the intercept,  $x_{k,i}$  is the intensity of the  $k$ th explanatory variable at the  $i$ th pond with

270 its regression coefficient  $\beta_k$ , and  $r_i$  is a pond-specific random effect.  $r_i$  follows the normal  
271 distribution with average 0 and standard deviation  $\sigma$ . For each of the models constructed above,  
272 we calculated maximum likelihood estimations for  $\alpha$ ,  $\beta_1, \dots, \beta_K$ , maximum marginal-likelihood  
273 estimation for  $\sigma$ , and the Akaike information criterion (AIC) [40]. To suppress the estimation  
274 bias of AIC as a distance measure from an unknown true model, we excluded models that had  
275 more free parameters than one-third of the sample size [41]; models with  $M/3 < K + 2$  (i.e.,  
276  $\beta_1, \dots, \beta_K$ ,  $\alpha$ , and  $\sigma$ ) were excluded. We also fitted the normal Poisson regression model by  
277 setting  $\sigma = 0$  in advance, in which case models with  $M/3 < K + 1$  (i.e.,  $\beta_1, \dots, \beta_K$ ,  $\alpha$ ) were  
278 excluded.

279 When the model with the lowest AIC, referred to as the contracted best model, had residuals  
280 with significant spatial autocorrelation (i.e.,  $p$ -value  $< 0.05$  in either Moran's  $I$  test or Geary's  $C$   
281 test), we excluded the model because the assumption of independence was violated, and we  
282 treated the second best model as the contracted best model. This operation was repeated until the  
283 spatial autocorrelation in the contracted best model's residuals became non-significant. (For the  
284 results reported in this paper, none of the initial best models had residuals with significant spatial  
285 autocorrelation.)

286

### 287 ***Statistical inference***

288 If the  $p$ -value for the regression coefficient of a focal explanatory variable is calculated by  
289 comparing the best model with its reduced model (generated by removing the focal variable from  
290 the best model) without taking into account the model selection conducted beforehand, then the  
291 calculated value is not an appropriate  $p$ -value for the null hypothesis that the focal explanatory  
292 variable has no effect on the response variable. This is because the model selection process

293 affects the  $p$ -value for the null hypothesis [42]. In this study, we calculated the  $p$ -value  
294 corresponding to a null hypothesis that a focal explanatory variable has no negative effect (i.e., a  
295 one-sided test) by using a permutation test that specifically operates the model selection for each  
296 of 1000 resampled datasets (S2 Appendix 2). However, this permutation test requires extremely  
297 heavy calculation. Thus, to efficiently search for explanatory variables with statistically  
298 significant negative effects, we first looked for their candidates, referred to as statistically  
299 contributive explanatory variables, and then applied the permutation test to examine the  
300 significance of those candidates' effects. Specifically, we judged that a focal explanatory  
301 variable is statistically contributive when the variable satisfies the following three conditions: (i)  
302 The focal explanatory variable is included in all models of  $\Delta\text{AIC} \leq C_{\Delta\text{AIC}}$  with  $C_{\Delta\text{AIC}} = 2.0$  (i.e.,  
303 differences in AIC from the contracted best model do not exceed 2.0), and its regression  
304 coefficients in those models have the same sign. (ii) In the contracted best model, the  $p$ -value for  
305 the regression coefficient of the focal explanatory variable is smaller than  $\alpha_{\Delta\text{AIC}} = 0.05$  based on  
306 the permutation of regressor residuals test [43]. (iii) The focal explanatory variable is also  
307 included (keeping its sign) in the uncontracted best model that is chosen by the stepwise model  
308 selection by AIC among models composed of environmental variables before contraction, where  
309 the contracted best model is used as the initial model.

310 Among the three conditions above, condition (i) is the most important, and conditions (ii) and  
311 (iii) suppress biases due to small sample sizes and contraction of explanatory variables,  
312 respectively. In condition (i), the threshold  $C_{\Delta\text{AIC}} = 2.0$  is chosen because any model with  
313  $\Delta\text{AIC} > 2.0$  is rejected by the parametric likelihood ratio test for significance level 0.05, when  
314 that model is nested in the contracted best model. Although this relationship does not hold for  
315 non-nested models, we consider choosing 2.0 to be a good strategy for finding the candidates for

316 explanatory variables with significant effects (see S2 Appendix 3 and S2 Appendix 4 for details).

317

### 318 *Interaction among statistically contributive explanatory variables*

319 When a focal animal category had more than one statistically contributive explanatory variable  
320 in the above analysis (for main effects), we further analyzed interactions among them. First, for  
321 each possible combination of the contributive variables, we calculated the product of the two  
322 variables' intensities at each pond and added it to the set of contracted environmental variables  
323 and to the set of uncontracted environmental variables. Second, we conducted the analysis  
324 described in the sections "Model selection" and "Statistical inference." Note that the set of  
325 models examined in this analysis for interactions includes the set of models in the analysis for  
326 main effects. Thus, AICs of the contracted best models in this analysis for interactions are  
327 always no higher than those of the corresponding contracted best models in the analysis for main  
328 effects. Therefore, the contracted best models with interactions are all as good as the  
329 corresponding contracted best models without interactions.

330

### 331 *Impacts of statistically contributive explanatory variables*

332 When the contracted best model had  $K$  explanatory variables, of which  $J$  variables had  
333 statistically contributive effects, we calculated their impacts on the response variable (taxonomic  
334 richness of the focal animal category) as follows. We permuted the explanatory variables so that  
335 the statistically contributive variables come first, which allowed rewriting of Eq. (2) as

$$336 \quad \ln(Y_i) = \alpha + \sum_{j=1}^J \beta_j x_{j,i} + \sum_{k=J+1}^K \beta_k x_{k,i} + r_i. \#(3)$$

337 We assumed a hypothetical 0th pond with all contributive variables having zero intensities and

338 all non-contributive variables having the average intensities among the studied ponds (i.e.,  $x_{j,0}$   
 339  $= 0$  for all  $j = 1, \dots, J$ , and  $x_{k,0} = \bar{x}_k = \frac{1}{M} \sum_{i=1}^M x_{k,i}$  for all  $k = J + 1, \dots, K$ ). We call this  
 340 hypothetical pond the normal pond. From Eq. (3), the expected taxonomic richness of the normal  
 341 pond is given by

$$342 \quad R = \exp \left( \alpha + \sum_{k=J+1}^K \beta_k \bar{x}_k \right), \#(4)$$

343 where  $R = Y_0$  holds for the normal Poisson regression ( $r_i = 0$ ). At the normal pond, if we  
 344 increase the intensity of the  $j$ th explanatory variable,  $x_{j,0}$ , from its minimum value 0 to its  
 345 average  $\bar{x}_j$  among the studied ponds, then the expected taxonomic richness is given by  $R_j^{\text{mean}} =$   
 346  $R \exp(\beta_j \bar{x}_j)$ . The change rate of the taxonomic richness is calculated as  $R_j^{\text{mean}}/R = \exp(\beta_j \bar{x}_j)$ .  
 347 On this basis, we calculated the mean impact of the  $j$ th explanatory variable as the strength of  
 348 the change rate,

$$349 \quad I_j^{\text{mean}} = \begin{cases} \frac{R_j^{\text{mean}}}{R} = \exp(\beta_j \bar{x}_j) & \text{for } \beta_j > 0 \\ \frac{R}{R_j^{\text{mean}}} = \exp(-\beta_j \bar{x}_j) & \text{for } \beta_j < 0. \end{cases} \#(5)$$

350 Note that  $I_j^{\text{mean}}$  for positive  $\beta_j$  indicates the strength of the increasing rate, whereas  $I_j^{\text{mean}}$  for  
 351 negative  $\beta_j$  gives the strength of the diminishing rate.

352 Analogously, if we increase the intensity of the  $j$ th explanatory variable from its minimum  
 353 value 0 to its maximum 1 at the normal pond, then the expected taxonomic richness is given by  
 354  $R_j^{\text{max}} = R \exp(\beta_j)$ . On this basis, we calculated the maximum impact of the  $j$ th explanatory  
 355 variable as follows:



$$I_j^{\max} = \begin{cases} \frac{R^{\max}}{R} = \exp(\beta_j) & \text{for } \beta_j > 0 \\ \frac{R}{R^{\max}} = \exp(-\beta_j) & \text{for } \beta_j < 0. \end{cases} \#(6)$$

When all statistically contributive variables in the contracted best model had negative effects (i.e.,  $\beta_j < 0$  for all  $j = 1, \dots, J$ ), then by assuming that the normal pond had the same intensities of those variables as those of the  $i$ th pond (i.e.,  $x_{j,0} = x_{j,i}$  for all  $j = 1, \dots, J$ ), we calculated the combined negative impact of those variables at the  $i$ th pond as the strength of diminishing rate,

$$I_{\{1, \dots, J\}}^i = \frac{R}{R \exp\left(\sum_{j=1}^J \beta_j x_{j,i}\right)} = \exp\left(-\sum_{j=1}^J \beta_j x_{j,i}\right) \#(7)$$

From this equation, we calculated the mean combined impact as a geometric mean among  $I_{\{1, \dots, J\}}^i$  for  $j = 1, \dots, J$ , as

$$I_{\{1, \dots, J\}}^{\text{mean}} = \left[\prod_{i=1}^M I_{\{1, \dots, J\}}^i\right]^{\frac{1}{M}} = \exp\left(-\sum_{j=1}^J \beta_j \bar{x}_j\right) \#(8)$$

which corresponds to the combined impact on the average pond. In addition, we calculated the maximum combined impact as the maximum among  $I_{\{1, \dots, J\}}^i$  for  $j = 1, \dots, J$  as

$$I_{\{1, \dots, J\}}^{\max} = \max\{I_{\{1, \dots, J\}}^1, \dots, I_{\{1, \dots, J\}}^M\} \#(9)$$

When some of statistically contributive variables had positive effects, those variables were omitted. In this study, we also omitted statistically contributive explanatory variables that did not have statistically significant effects. (As for the combined impact of positive effects, its mean and maximum can be calculated with Eqs. (7–9) by removing the minus symbol on the right-hand sides of Eqs. (7) and (8) and omitting variables with negative effects instead, although such a calculation was not conducted in this study.)

374

## 375 **Results**

### 376 *Detected effects of environmental stressors on taxonomic richness*

377 With regard to the taxonomic richness of the all-sampled category and its 11 subcategories, we  
378 found statistically contributive effects of probenazole (fungicide), BPMC (insecticide), concrete  
379 bank, bluegill, F-plant noncoverage, and shallowness, all of which were negative (Figs 2 and 3).  
380 Each of these negative effects was statistically significant in at least one animal category (see S9  
381 Table for the calculated  $p$ -values, and S2 Appendix 5 for the best models). For convenience and  
382 brevity, we refer to the explanatory variables with statistically contributive negative effects and  
383 those with statistically significant negative effects as “stressors” and “significant stressors,”  
384 respectively.

385 Although probenazole and BPMC were neither significant nor contributive stressors on the  
386 all-sampled category (Fig 2a), probenazole was a unique and significant stressor on the fish  
387 subcategory (Fig 2b), and BPMC was one of three significant stressors (BPMC, F-plant  
388 noncoverage, and bluegill) on the large insect subcategory (Fig 2d). As for the other  
389 subcategories (reptiles, mollusks, crustaceans, small insects, and annelids), only small insects  
390 had a stressor, concrete bank, which was also significant (Fig 2c).

391

392 **Fig 2. Statistically contributive stressors on taxonomic richness of all-sampled category and**  
393 **three subcategories: fishes, small insects (Diptera), and large insects (Coleoptera,**  
394 **Ephemeroptera, Hemiptera, Lepidoptera, Odonata, and Trichoptera).** Stressors labeled with  
395 an asterisk are statistically significant. In each panel, the white bar indicates the expected  
396 taxonomic richness of the focal animal category in the absence of all statistically contributive

397 stressors ( $R$  in Eq. (4) in the main text). The light gray (or dark gray) bar indicates the expected  
398 taxonomic richness in the presence of only the focal stressor denoted by  $x_j$  at its mean intensity  
399 (or maximum intensity, scaled to 1.0) among the studied ponds, given by  $R_{\text{exp}}(\beta_j \bar{x}_j)$  (or  $R$   
400  $\text{exp}(\beta_j)$ ), with its regression coefficient  $\beta_j$  in the contracted best model (S2 Appendix 5). The  
401 value labeled with “mean” (or “max”) shows the mean (or maximum) impact of the focal  
402 stressor among ponds, given by the height ratio of the white bar to the light gray bar (or dark  
403 gray bar). Specifically, the mean (or maximum) impact was calculated as  $R/(R_{\text{exp}}(\beta_j \bar{x}_j)) =$   
404  $\text{exp}(-\beta_j \bar{x}_j)$  (or  $\text{exp}(-\beta_j)$ ) (see “Impacts of statistically contributive explanatory variables”  
405 section). The estimation errors were calculated as Wald 95% confidence intervals, indicated in  
406 the format of (lower bound – upper bound). The solid curve indicates the expected taxonomic  
407 richness as a function  $R_{\text{exp}}(\beta_j x_j)$  of the focal stressor’s intensity  $x_j$ . The scatter plots indicate  
408  $R_{\text{exp}}(\beta_j x_{j,i}) + \varepsilon_i$ , where  $x_{j,i}$  is the intensity of the focal stressor at the  $i$ th pond, and  $\varepsilon_i$  is the  
409 fitting residual of the contracted best model for the  $i$ th pond.

410

411

412 When considering the large animal category, both shallowness and F-plant noncoverage were  
413 significant stressors (Fig 3a), whereas the small animal category had a different set of significant  
414 stressors: BPMC, F-plant noncoverage, and concrete bank (Fig 3b). The invertebrate category  
415 had a similar tendency as that of the small animal category, but only F-plant noncoverage was  
416 significant (Fig 3c). The vertebrate category had no stressors (data not shown).

417

418 **Fig 3. Statistically contributive stressors on taxonomic richness of categories of large**

419 **animals (reptiles, fishes, mollusks, crustaceans, and large insects), small animals (small**

420 **insects and annelids), and invertebrates (mollusks, crustaceans, large insects, small insects,**  
421 **and annelids).** The plotting was done as in Fig 2.

422

423

424 Further analysis of interactions among the detected stressors revealed statistically significant  
425 positive interactions between BPMC and bluegill for the large insect category (Fig 4a) and  
426 between BPMC and concrete bank for both the small animal (Fig 4b) and invertebrate categories  
427 (Fig 4c).

428

429 **Fig 4. Statistically significant interactions among stressors on taxonomic richness of**  
430 **categories of large insects (Coleoptera, Ephemeroptera, Hemiptera, Lepidoptera, Odonata,**  
431 **and Trichoptera), small animals (small insects and annelids), and invertebrates (mollusks,**  
432 **crustaceans, large insects, small insects, and annelids).** Result of analysis for detecting  
433 interactions among statistically contributive stressors in Figs 2 and 3 is shown. The plotting was  
434 done as in Fig 2.

435

436

437 Each panel in Figs 2–4 lists the mean and maximum impacts of the focal stressor among the  
438 ponds, defined by Eqs. (5) and (6), respectively. Although the mean and maximum impacts have  
439 large estimation errors, probenazole and BPMC tended to have weak mean impacts but strong  
440 maximum impacts.

441 Our analysis indicates that probenazole contamination has diminished the taxonomic richness  
442 of the fish category to  $1/(\text{mean impact}) = 1/1.32$  at the mean among ponds and to  $1/(\text{max.}$

443 impact) =  $1/2.80$  at the worst pond (Fig 2b). In other words, the expected mean and maximum  
444 losses of the fish taxonomic richness caused by probenazole are  $100 \times (1 - 1/1.32) = 24\%$  and  
445  $100 \times (1 - 1/2.80) = 64\%$ , respectively.

446 As for BPMC, the contracted best models with interactions (Fig 4) were all as good as the  
447 corresponding contracted best models without interactions (Figs 2 and 3), as explained in section  
448 “Interaction among statistically contributive explanatory variables.” Thus, Fig 4 is more suitable  
449 for the estimation of BPMC’s impacts. For the large insect category (Fig 4a), the interaction  
450 effect of BPMC and bluegill had a mean impact of 1.36 (26% loss) and maximum impact of  
451 13.17 (92% loss). For the small animal category (Fig 4b), the interaction effect of BPMC and  
452 concrete bank had a mean impact of 1.19 (16% loss) and maximum impact of 3.69 (73% loss).  
453 For the invertebrate category (Fig 4c), the interaction effect of BPMC and concrete bank had a  
454 mean impact of 1.18 (15% loss) and maximum impact of 3.51 (72% loss).

455

#### 456 ***Combined impact of statistically significant stressors***

457 Multiple significant stressors were detected for the large insect, large animal, and small animal  
458 categories (Figs 2–4). Since Poisson regression models were used for the fitting, the impacts of  
459 those stressors are multiplicative (explained in section “Impacts of statistically contributive  
460 explanatory variables”). Thus, the combined impacts, defined by Eq. (7), can be plotted as  
461 additive effects on a logarithmic scale, as shown in Fig 5.

462

463 **Fig 5. Estimation of combined impacts of statistically significant stressors.** For each animal  
464 category that has multiple statistically significant stressors in Figs 2–4, the combined impact of  
465 those stressors in each pond is plotted as the reciprocal of the diminishing ratio of the taxonomic

466 richness, by using the contracted best model (S2 Appendix 5). The numbers atop bars indicate  
467 pond IDs shown in Fig 1. (See text in “Impacts of statistically contributive explanatory  
468 variables.”)

469

470

471 Clearly, the stressors’ combined impacts are much stronger than the impact of each alone. Note  
472 that the stressors in Figs 5a and 5d (main effects only) are all included in Figs 5b and 5e (with  
473 interaction), respectively, where some of the main effects are replaced by their interactions.

474 Since the contracted best models with interactions are all as good as the corresponding  
475 contracted best models without interactions, we here focus on those with interactions (Figs 5b  
476 and 5e) for the large insect and small animal categories.

477 Figure 5b indicates that the three significant stressors (BPMC, bluegill, and F-plant  
478 noncoverage) diminish the taxonomic richness of the large insect category to  $1/(\text{mean impact}) =$   
479  $1/4.43$  at the mean among ponds and to  $1/(\text{max. impact}) = 1/13.17$  at the worst pond. In other  
480 words, the expected mean and maximum losses of the taxonomic richness of the ponds are  $100 \times$   
481  $(1 - 1/4.43) = 78\%$  and  $100 \times (1 - 1/13.17) = 92\%$ , respectively, in comparison with the  
482 hypothetical normal pond free from all stressors. Likewise, Figure 5c indicates that the two  
483 significant stressors (shallowness and F-plant noncoverage) diminish taxonomic richness of the  
484 large animal category to  $1/4.15$  (76% loss) at the mean among ponds and to  $1/6.96$  (86% loss) at  
485 the worst pond. Figure 5e indicates that the three significant stressors (BPMC, concrete bank,  
486 and F-plant noncoverage) diminish taxonomic richness of the small animal category to  $1/1.61$   
487 (38% loss) at the mean among ponds and to  $1/4.22$  (76% loss) at the worst pond.

488

489 **Discussion**

490 ***Impact of pesticides***

491 Our study suggests that probenazole (fungicide) is a stressor on fish taxonomic richness in the  
492 studied ponds. Probenazole is a benzothiazole fungicide widely used in Asia for the control of  
493 rice blast fungus (*Magnaporthe grisea*) in paddy fields [44]. Its acute toxicity levels for the fish  
494 *Cyprinus carpio*, the crustacean *Daphnia magna*, and the aquatic plant *Raphidocelis subcapitata*  
495 [45] are all more than 1000-fold the maximum detected concentration of 0.73 µg/L measured in  
496 this study. As for the chronic effects of probenazole on fishes, we found no relevant  
497 experimental or field study. In general, however, fungicides can have diverse lethal and sublethal  
498 chronic effects on fishes and affect their physiology, development, and behavior [46]. In  
499 addition, some fungicides exhibit significant toxicity only when combined with other pesticides  
500 [47, 48]. Moreover, probenazole has a rapid decomposition rate (half-life of 9.8 h at pH 7 and  
501 25 °C [45]) compared to our sampling frequency (once or twice per month), in which case the  
502 actual concentrations attained in the studied ponds could have been far higher than the detected  
503 concentrations. Therefore, our result may imply that probenazole actually has a negative impact  
504 on fish taxonomic richness. To clarify its impact, further experimental and field research is  
505 needed.

506 Our findings also suggest that BPMC is a stressor on the taxonomic richness of large insects  
507 (Coleoptera, Ephemeroptera, Hemiptera, Lepidoptera, Odonata, and Trichoptera), small animals  
508 (Diptera, annelids, bryozoans, and sponges), and invertebrates in the studied ponds. BPMC  
509 (fenobucarb) is a carbamate insecticide widely used in Asia to control rice planthoppers, but its  
510 impact on other invertebrates in the field is unclear. BPMC has a long half-life of 577 days (at  
511 pH 7 and 25 °C) [49], and its acute toxicity levels are 24-h EC<sub>50</sub> = 10.2 µg/L for *D. magna*, 96-h

512 LC50 = 25,200  $\mu\text{g/L}$  for *C. carpio*, and 72-h EC50 = 33,000  $\mu\text{g/L}$  for *R. subcapitata* (lowest  
513 values in [49]). However, even lower toxicity levels are reported for freshwater invertebrates:  
514 96-h LC50 = 5.05  $\mu\text{g/L}$  for the freshwater shrimp *Paratya improvisa* [50] and 48-h LC50 = 2  
515  $\mu\text{g/L}$  for the mayfly *Baetis thermicus* [51]. As for the chronic effect of BPMC, a concentration of  
516 1  $\mu\text{g/L}$  affects the development of the mayfly *Epeorus latifolium* [51]. Although 1  $\mu\text{g/L}$  is still  
517 higher than the maximum concentration of 0.08  $\mu\text{g/L}$  detected in our study, due to our once or  
518 twice monthly sampling the maximum concentration actually attained in the studied ponds could  
519 have been higher than 0.08  $\mu\text{g/L}$ . Indeed, for pesticides in general, we can estimate from [16]  
520 (see figure 2A) that the regional species richness of freshwater invertebrates would be reduced  
521 significantly when the detected pesticide concentrations attain 1/400th of their 48-h LC50 for *D.*  
522 *magna*. As for BPMC, its 48-h LC50 for *D. magna* is expected to be lower than its 24-h EC50 =  
523 10.2  $\mu\text{g/L}$  (because for *D. magna* the 48-h LC50 is essentially the same as the 48-h EC50, which  
524 must be lower than the 24-h EC50 = 10.2  $\mu\text{g/L}$ ). Thus, we can roughly estimate that invertebrate  
525 taxonomic richness in our studied ponds would decline at  $10.2/400 = 0.026$   $\mu\text{g/L}$  of BPMC,  
526 which is less than the maximum detected concentration of 0.08  $\mu\text{g/L}$  in our study. Therefore, our  
527 results for the large insect, small animal, and invertebrate categories accord with the results of  
528 [16] about pesticides' effects on regional invertebrate diversities.

529 Furthermore, BPMC contamination may also be affecting invertebrate taxonomic diversities  
530 in Japanese rivers, since far higher BPMC concentrations (5.6–37  $\mu\text{g/L}$ ) have been reported from  
531 some of class A rivers [50, 52, 53]. Yachi et al. [54] estimated the maximum BPMC  
532 concentrations ( $\text{PEC}_{\text{Tier2}}$ ) at 350 river flow monitoring sites in 2010, using experimental data and  
533 the region-specific parameters of river flow, rice cultivation area, and pesticide usage ratio. From  
534 figure 3 in [54], we can estimate that the upper 5% of those monitoring sites exceed 10  $\mu\text{g/L}$ .



535 Thus, invertebrates in Japanese rivers may be in a serious situation due to BPMC pollution.

536 In Japan, to prevent significant effects of a pesticide on aquatic organisms, pesticide  
537 registration standards are set based on acute toxicity test results of fishes, crustaceans, and algae.  
538 For pesticide registration (i.e., usage permission), the predicted environmental concentration  
539 (PEC) of the target pesticide must be lower than the registration standard of that pesticide [54].  
540 Normally, PEC is calculated hierarchically according to the defined environmental model. For  
541 BPMC, its PEC of 2.1  $\mu\text{g/L}$  according to the environmental model ( $\text{PEC}_{\text{Tier2}}$  in [54]) was close to  
542 its registration standard of 1.9  $\mu\text{g/L}$ , and PEC estimation from on-site monitoring data was  
543 permitted. Since the estimated value, 0.67  $\mu\text{g/L}$ , was lower than the registration standard [49],  
544 the registration of BPMC has not been suspended, in other words, its application has not been  
545 restricted. This monitoring is expected to be conducted in accordance with test guidelines for two  
546 sites where high concentrations are expected from pesticide use [49]. However, the maximum  
547 observed concentration of 0.67  $\mu\text{g/L}$  is much lower than the 5.6–37  $\mu\text{g/L}$  reported for class A  
548 rivers [50, 52, 53]. Therefore, more monitoring sites in different regions may be needed to  
549 properly assess BPMC environmental concentrations in Japan, although use of BPMC in Japan  
550 has declined sharply since the 1990s, with the shipment volume of BPMC in 2015 representing  
551 only 3% of that in 1990.

552 With regard to the other 28 pesticides detected in our study, their relationships with  
553 taxonomic richness were unclear. In our statistical analysis, those pesticides had high  
554 correlations with other environmental variables (e.g., variables related to eutrophication), and  
555 thus they were contracted together and transformed into pseudo variables. For statistical  
556 evaluation of those pesticides' impacts, we need to examine a different set of irrigation ponds  
557 than used in this study.

558

559 ***Impacts of other statistically significant stressors***

560 For the other statistically significant stressors detected in this study, previous studies support our  
561 results: see [19] for concrete bank, [55] and [19] for bluegill in irrigation ponds, [35] for lack of  
562 floating-leaved plant coverage in peatland drainage ditches, [36] for shallowness in floodplain  
563 lakes, and [37] for shallowness in ponds in an agricultural area. Among those studies, [19]  
564 surveyed irrigation ponds in the same region as our study, showing that not only concrete bank  
565 and bluegill but also chlorophyll *a* concentration was an important stressor on the taxonomic  
566 richness of freshwater animals. In our study, however, neither a statistically significant nor a  
567 contributive effect of chlorophyll *a* was detected. This difference may stem from the fact that our  
568 study considered pesticide contaminations and plant coverage as environmental variables,  
569 whereas [19] did not. In our study, the F-plant noncoverage was a statistically significant  
570 stressor, and it had a positive correlation ( $r = 0.33$ ) with chlorophyll *a*, which may explain the  
571 difference at least in part.

572 Among the statistically significant stressors detected in our study, careful attention should be  
573 paid to the estimated impacts of shallowness and F-plant noncoverage. In this study, zero  
574 intensities for shallowness and F-plant noncoverage correspond to the maximum pond depth of  
575 4.83 m and the highest F-plant coverage of 93%. In other words, we assumed that the all ponds  
576 originally had 4.83 m depth and 93% F-plant coverage, which may not necessarily correspond to  
577 their actual stress-free original states. However, their significant negative correlations with the  
578 taxonomic richness imply, at least, their potential as stressors, meaning that further increases in  
579 shallowness and F-plant noncoverage may decrease taxonomic richness. Conversely, if we can  
580 increase the water depth or F-plant coverages of those ponds, the taxonomic richness may

581 recover.

582

### 583 *Combined impact of pesticides and other stressors*

584 Our findings suggest that the taxonomic richness of freshwater animals in Japanese irrigation  
585 ponds has been affected by multiple significant stressors including pesticides. BPMC, F-plant  
586 noncoverage, and bluegill affect the large insect category (Figs 2d and 4a), shallowness and  
587 F-plant noncoverage affect the large animal category (Fig 3a), and BPMC, F-plant noncoverage,  
588 and concrete bank affect the small animal category (Figs 3b and 4b). According to [56], multiple  
589 stressors tend to act antagonistically, and therefore their cumulative mean effect is less than the  
590 sum of their single mean effects. In our analysis using the Poisson regression, when taxonomic  
591 richness was evaluated on a logarithmic scale (like the Shannon diversity index), a mean  
592 combined impact of multiple stressors was mathematically equal to the sum of their single mean  
593 impacts, as shown in Fig 5. On the other hand, when taxonomic richness was evaluated on the  
594 normal scale, all of the mean combined impacts in Figure 5, except for the combined impacts on  
595 the large insect category, were weaker than the sum of the single mean impacts in Figures 2–4, in  
596 accordance with [56].

597 Our results show that the combined impact of BPMC and other significant stressors may  
598 have caused serious declines in taxonomic richness of the categories of large insect, small  
599 animal, and invertebrate, although our estimations have large uncertainties. We detected  
600 significantly positive interactions between BPMC and bluegill for the large insect category and  
601 between BPMC and concrete bank for the invertebrate and small animal categories. The former  
602 interaction is supported by an experimental study by Schulz and Dabrowski [57], who reported  
603 that the mortality of mayflies caused by insecticide exposure (azinphos-methyl and fenvalerate)

604 synergistically increases with the presence of predatory fish. We found no relevant literature on  
605 the latter interaction.

606

### 607 ***Our statistical method***

608 In multivariate regression analysis, too many explanatory variables can lead to a  
609 multicollinearity problem as well as extremely heavy calculation for model selection procedures.  
610 However, removing and/or aggregating some of those variables based on relevant previous  
611 studies may cause difficulty in detection of unknown relationships between the response and  
612 explanatory variables. To handle this difficulty, we developed a new statistical procedure for  
613 multivariate regression analysis by combining the contraction of explanatory variables (by using  
614 only correlations among them), best-subset model selection, stepwise model selection, and  
615 permutation tests. This procedure enabled us to detect previously unknown and significantly  
616 negative effects of two pesticides, probenazole (fungicide) and BPMC (insecticide), on  
617 taxonomic richness of the sampled animals and to evaluate the combined impacts of BPMC and  
618 other environmental stressors. In principle, our procedure is applicable to data with not only  
619 univariate response variables but also multivariate ones, as long as the models' AICs (or other  
620 suitable criteria) can be calculated.

621 In this study, the most statistically contributive stressors, those satisfying conditions (i–iii)  
622 defined in the “Statistical inference” section, were also statistically significant in the permutation  
623 test that explicitly repeats the model selection process. Thus, first finding statistically  
624 contributive explanatory variables and then examining their statistical significance may be an  
625 efficient strategy, because the permutation test that repeats model selection requires heavy  
626 calculation. Further examination and improvement of our procedure, and clarification of its

627 relationships with other approaches for post-model-selection inference [42, 58-60], may provide  
628 more efficient and robust tools for such inference.

629

### 630 **Acknowledgements**

631 We thank Y. Oikawa and A. Saji (National Institute for Environmental Studies, Tsukuba; NIES)  
632 for pretreatment of samples for water quality analysis; Y. Oikawa (NIES) for pretreatment of  
633 samples for pesticide analysis; S. Serizawa and I. Hirai (NIES) for assistance with pesticide  
634 analysis; T. Murakami (Regional Ecosystem Conservation), Y. Daihu (Regional Ecosystem  
635 Conservation), I. Murakami (Regional Environmental Planning Inc.), R. Ueno (NIES), A.  
636 Ohtaka (Nirosaki University), and U. Nishikawa (NIES) for animal sampling; M. Akasaka for  
637 investigation of peripheral land use and pond vegetation; and M. Imada (NIES) for interviewing  
638 pond owners about drainage.

639

640

641 **References**

- 642 1. Costanza R, d'Arge R, de Groot R, Farber S, Grasso M, Hannon B, Limburg K, Naeem S,  
643 O'Neill RV, Paruelo J, Raskin R, Sutton R, van den Belt M. The value of the world's  
644 ecosystem services and natural capital. *Nature* 1997;387: 253-260.
- 645 2. Covich AP, Ewel KC, Hall RO, Gillier RE, Godekoop W, Merritt DM. Ecosystem services  
646 provided by freshwater benthos. In: Wall DH, editor. *Sustaining Biodiversity and Ecosystem  
647 Services in Soil and Sediments*. Washington D.C.: Island Press; 2004. pp. 45-72.
- 648 3. Lundberg G, Kottelat M, Smith GR, Stiassny MLJ, Gill AC. So many fishes, so little time: an  
649 overview of recent ichthyological discovery in continental waters. *Annals of the Missouri  
650 Botanical Gardens* 2000;87: 26-62.
- 651 4. Dudgeon D, Arthington AH, Gessner MO, Kawabata ZI, Knowler DJ, Leveque C, Naiman RJ,  
652 Prieur-Richard AH, Soto D, Stiassny MLJ, Sullivan CA. Freshwater biodiversity: Importance,  
653 threats, status and conservation challenges. *Biological Reviews* 2006;81: 163-182.
- 654 5. Reid AJ, Carlson AK, Creed IF, Eliason EJ, Gell PA, Johnson PT, Cooke SJ. Emerging threats  
655 and persistent conservation challenges for freshwater biodiversity. *Biological Reviews*  
656 2019;94: 849-873. <https://doi.org/10.1111/brv.12480>
- 657 6. Ricciardi A, Rasmussen JB. Extinction Rates of North American Freshwater Fauna.  
658 *Conservation Biology* 1999;13: 1220-1222.
- 659 7. Grooten M, Almond REA (eds). *Living planet report, 2018: aiming higher*. Gland,  
660 Switzerland: World Wildlife Fund; 2018.
- 661 8. Cardinale BJ, Duffy JE, Gonzalez A, Hooper DU, Perrings C, Venail R, Narwani A, Georgina  
662 M, Mace GM, Tilman D, Wardle DA, Kinzig AP, Daily GC, Loreau M, Grace LB,  
663 Larigauderie A, Srivastava DS, Naeem S. Biodiversity loss and its impact on humanity.

- 664 Nature 2012;486: 59-67.
- 665 9. Nõges P, Argillier C, Borja A, Garmendia JM, Hanganu J, Kodeš V, Pletterbauer F, Sagouis  
666 A, Birk S. Quantified biotic and abiotic responses to multiple stress in freshwater, marine and  
667 ground waters. *Science of Total Environment* 2015;540: 43-52.
- 668 10. Relyea RA. Assessing the ecology in ecotoxicology: a review and synthesis in freshwater  
669 systems. *Ecology Letters* 2006;9: 1157-1171.
- 670 11. Malaj E, Peter C, Grote M, Kühne R, Mondy CP, Usseglio-Polatera P. Organic chemicals  
671 jeopardize the health of freshwater ecosystems on the continental scale. *Proceedings of the*  
672 *National Academy of Sciences* 2014;111(26): 9549-9554.
- 673 12. Relyea RA. The impact of insecticides and herbicides on the biodiversity and productivity of  
674 aquatic communities. *Ecological Applications* 2005;15: 618-627.
- 675 13. Berenzen N, Kumke T, Schultz HK, and Schultz R. Macroinvertebrate community structure  
676 in agricultural streams: impact of runoff-related pesticide contamination. *Ecotoxicology and*  
677 *Environmental Safety* 2005;70: 37-46.
- 678 14. Schäfer RB, Van den Brink PJ, Liess M. Impacts of pesticides on freshwater ecosystems. In:  
679 Sánchez-Bayo F, van den Brink PJ, Mann RM, editors. *Ecological Impacts of Toxic*  
680 *Chemicals*. Soest: Bentham Science Publishers; 2011. pp. 111-137.
- 681 15. Schäfer RB, Liess M. Species at risk (SPEAR) biomonitoring indicators. In: Ferard J, Blaise  
682 C, editors. *Encyclopedia of Aquatic Ecotoxicology*. Heidelberg: Springer; 2013. pp.  
683 1063-1073.
- 684 16. Beketov MA, Kefford BJ, Schäfer RB, Liess M. Pesticides reduce regional biodiversity of  
685 stream invertebrates. *Proceedings of the National Academy of Sciences USA* 2013;110(27):  
686 11039-11043.

- 687 17. Stehle S, Schulz R. Agricultural insecticides threaten surface waters at the global scale.  
688 Proceedings of the National Academy of Sciences USA 2015;112(18): 5750-5755. doi:  
689 10.1073/pnas.1500232112.
- 690 18. Takamura N. Status of biodiversity loss in lakes and ponds in Japan. In: Nakano S, Yahara T,  
691 Nakashizuka T, editors. Biodiversity observation network in the Asia-Pacific Region: toward  
692 further development of monitoring. Tokyo: Springer; 2012. pp 133-148.
- 693 19. Kadoya T, Akasaka M, Aoki T, Takamura N. A proposal of framework to obtain an  
694 integrated biodiversity indicator for agricultural ponds incorporating the simultaneous effects  
695 of multiple pressures. Ecological Indicators 2011;11(5): 1396-1402.
- 696 20. Kizuka T, Akasaka M, Kadoya T, Takamura N. Visibility from roads predicts the distribution  
697 of invasive fishes in agricultural ponds. PLoS ONE 2014;9(6): e99709.  
698 <https://doi.org/10.1371/journal.pone.0099709>.
- 699 21. Nakanishi K, Nishida T, Kon M, Sawada H. Effects of environmental factors on the species  
700 composition of aquatic insects in irrigation ponds. Entomological Science 2014;17: 251-261.
- 701 22. Stenert C, de Mello ÍCMF, Pires MM, Knauth DS, Katayama N, Maltchik L. Responses of  
702 macroinvertebrate communities to pesticide application in irrigated rice fields. Environmental  
703 Monitoring and Assessment 2018;190 (2): 74.
- 704 23. Declerck S, De Bie T, Ercken D, Hampel H, Schrijvers S, Van Wichelen H, Gillard V, et al.  
705 Ecological characteristics of small farmland ponds: associations with land use practices at  
706 multiple spatial scales. Biological Conservation 2006;131: 523-532.
- 707 24. Kawano K, Akano HN, Hayashi M, Yamauchi T. Aquatic insects in the ponds of Hirata Area  
708 (Izumo City) in Shimane Prefecture (in Japanese). Japanese Bulletin of Hoshizaki Green  
709 Foundation 2006;9: 13-37.



- 710 25. Chester ET, Robson BJ. Anthropogenic refuges for freshwater biodiversity: their ecological  
711 characteristics and management. *Biological Conservation* 2013;166: 64-75.
- 712 26. Kim JH, Chung HY, Kim SH, Kim JG. The influence of water characteristics on the aquatic  
713 insect and plant assemblage in small irrigation ponds in Civilian Control Zone. *Korea Journal*  
714 *of Wetlands Research* 2016;18(4): 331-341.
- 715 27. Nicolet P, Biggs J, Fox G, Hodson MJ, Reynolds C, Whitfield M, Williams P. The wetland  
716 plant and macroinvertebrate assemblages of temporary ponds in United Kingdom and Wales.  
717 *Biological Conservation* 2004;120(2): 261-278.
- 718 28. Iitomi A, Niiyama T. Dominant pests and their damage to water shield in Akita (in Japanese).  
719 *Annual Report of the Society of Plant Protection of North Japan* 2002;53: 256-260.
- 720 29. Armitage PD, Cranston PS, Pinder LCV. *The Chironomidae: the biology and ecology of*  
721 *non-biting midges*. London: Chapman Hall; 1995.
- 722 30. Usio N, Imada M, Nakagawa M, Akasaka M, Takamura N. Effects of pond draining on  
723 biodiversity and water quality of farm ponds. *Conservation Biology* 2013;27(6): 1429-1438.  
724 doi: 10.1111/cobi.12096
- 725 31. Akasaka M, Takamura N, Mitsuhashi H, Kadono Y. Effects of land-use on aquatic  
726 macrophyte diversity and water quality of ponds. *Freshwater Biology* 2010;55: 909-922.
- 727 32. Takamura N. Biodiversity monitoring at agricultural ponds. In: Washitani I, Kito S, editors.  
728 *Biodiversity monitoring: collaboration to build capacity for ecosystem management (in*  
729 *Japanese)*. Tokyo: University of Tokyo Press; 2007. pp 49-69.
- 730 33. Japanese Ministry of the Environment. Fenobucarb (BPMC) (in Japanese). 2012 [Cited 2019  
731 December 15]. Available from:  
732 [http://www.env.go.jp/water/sui-kaitei/kijun/rv/h63\\_butachlor.pdf](http://www.env.go.jp/water/sui-kaitei/kijun/rv/h63_butachlor.pdf)

- 733 34. Japanese Ministry of the Environment. Fenobucarb (BPMC) (in Japanese). 2012 [Cited 2019  
734 December 15]. Available from:  
735 [http://www.env.go.jp/water/sui-kaitei/kijun/rv/h01\\_pentoxazone.pdf](http://www.env.go.jp/water/sui-kaitei/kijun/rv/h01_pentoxazone.pdf)
- 736 35. Whatley MH, van Loon EE, van Dam E, Vonk JA, van der Geest HG, Admiraal W.  
737 Macrophyte loss drives decadal change in benthic invertebrates in peatland drainage ditches.  
738 *Freshwater Biology* 2014;59: 114-126.
- 739 36. Dembkowski DJ, Miranda LE. Hierarchy in factors affecting fish biodiversity in floodplain  
740 lakes of the Mississippi alluvial valley. *Environmental Biology of Fishes* 2012;93: 357-368.
- 741 37. Queiroz CS, da Silva FR, da Rossa-Feres DC. The relationship between pond habitat depth  
742 and functional tadpole diversity in an agricultural landscape. *Royal Society Open Science*  
743 2015;2: 150165.
- 744 38. Tsunoda, H. Ecological impacts of pond losses and abandonments on regional aquatic  
745 biodiversity: What will happen in the depopulating Japan? (in Japanese). *Wildlife and Human*  
746 *Society* 2017;5: 5-15.
- 747 39. Azovsky AI. Species–area and species–sampling effort relationships: Disentangling the  
748 effects. *Ecography* 2011;34(1):18-30.
- 749 40. Akaike H. Information theory and an extension of the maximum likelihood principle.  
750 In: Petrov BN, Caski F, editors. *Proceedings of the 2nd International Symposium on*  
751 *Information Theory*. Budapest: Akademiai Kiado; 1973. pp. 267-281.
- 752 41. Kitagawa M, Sakamoto Y, Ishiguro M, Kitagawa G. *Entropy statistics* (in Japanese). Tokyo:  
753 Kyoritsu Press; 1983.
- 754 42. Taylor J, Tibshirani RJ. Statistical learning and selective inference. *Proceedings of the*  
755 *National Academy of Sciences USA* 2015;112(25): 7629-7634. doi:

- 756 <http://www.pnas.org/content/112/25>.
- 757 43. Werft W, Benner A. glmperm: a permutation of regressor residuals test for inference in  
758 generalized linear models. R Journal 2010;2(1): 39-43.
- 759 44. Yoshioka K, Nakashita H, Klessig DF, Yamaguchi I. Probenazole induces systemic acquired  
760 resistance in Arabidopsis with a novel type of action. The Plant Journal 2001;25(2): 149-157.
- 761 45. Japanese Ministry of the Environment. Probenazole (in Japanese). 2010 [Cited 2019  
762 December 15]. Available from:  
763 [https://www.env.go.jp/water/sui-kaitei/kijun/rv/h37\\_probenazole.pdf](https://www.env.go.jp/water/sui-kaitei/kijun/rv/h37_probenazole.pdf)
- 764 46. Choudhury N. Ecotoxicology of aquatic system: a review on fungicide-induced toxicity in  
765 fishes. Progress in Aqua Farming and Marine Biology 2018;1(1): 180001.
- 766 47. Elskus AA. Toxicity, sublethal effects, and potential modes of action of select fungicides on  
767 freshwater fish and invertebrates. U.S. Geological Survey Open-File Report; 2012. pp. 42.  
768 (<http://dx.doi.org/10.3133/ofr20121213>).
- 769 48. Dawoud M, Bundschuh M, Goedkoop W, McKie BG. Interactive effects of an insecticide  
770 and a fungicide on different organism groups and ecosystem functioning in a stream detrital  
771 food web. Aquatic Toxicology 2017;186: 215-221.
- 772 49. Japanese Ministry of the Environment. Fenobucarb (BPMC) (in Japanese). 2012 [Cited 2019  
773 December 15]. Available from:  
774 [http://www.env.go.jp/water/sui-kaitei/kijun/rv/h61\\_fenobcarb.pdf](http://www.env.go.jp/water/sui-kaitei/kijun/rv/h61_fenobcarb.pdf)
- 775 50. Hatakeyama S, Shiraishi H, Hamada A. Seasonal variation of pesticide toxicity bioassayed  
776 using a freshwater shrimp (*Paratya compressa improvisa*) in water collected from rivers of the  
777 Lake Kasumigaura water system. Water Pollution Research 1991;14: 460-468.
- 778 51. Tada M, Hatakeyama S. Chronic effects of an insecticide, fenobucarb, on the larvae of two

- 779 mayflies, *Epeorus latifolium* and *Baetis thermicus*, in model streams. *Ecotoxicology* 2000;9:  
780 187-195.
- 781 52. Nakashima T, Ito Y, Fujita Y, Dobashi Y. Fate of pesticides aerially sprayed on paddy fields  
782 in river water (in Japanese). *Journal of Environmental Laboratories Association* 1996;21(2):  
783 81-87.
- 784 53. Sakai M, Tada M. Investigation of pesticides in the Tsurumi River (April 2011–March 2012)  
785 (in Japanese). *Annual Reports of the Institute of Yokohama-city Environmental Science*  
786 2013;37: 13-18.
- 787 54. Yachi S, Nagai T, Inao K. Analysis of region-specific predicted environmental concentration  
788 of paddy pesticides at 350 river flow monitoring sites (in Japanese). *Journal of Pesticide*  
789 *Science* 2017;42(1): 1-9.
- 790 55. Maezono Y, Miyashita T. Community-level impacts induced by introduced largemouth bass  
791 and bluegill in farm ponds in Japan. *Biological Conservation* 2003;109: 111-121.
- 792 56. Jackson MC, Loewen CJG, Vinebrooke RD, Chimimba CT, Christian T. Net effects of  
793 multiple stressors in freshwater ecosystems: a meta-analysis. *Global Change Biology*  
794 2016;22(1): 180-189.
- 795 57. Schulz R, Dabrowski JM. Combined effects of predatory fish and sublethal pesticide  
796 contamination on the behavior and mortality of mayfly nymphs. *Environmental Toxicology*  
797 *and Chemistry* 2001;20: 2537-2543.
- 798 58. Leeb H, Pötscher BM, Ewald K. On various confidence intervals post-model-selection.  
799 *Statistical Science* 2015;30: 216-227.
- 800 59. Taylor, J., and R. Tibshirani. Post-selection inference for  $l_1$  penalized likelihood models. *The*  
801 *Canadian Journal of Statistics* 2018;46: 41-61.

802 60. Lee SMS, Wu Y. A bootstrap recipe for post-model-selection inference under linear  
803 regression models. *Biometrika* 2018;105: 873-890. <https://doi.org/10.1093/biomet/asy046>.

804

### 805 **Supporting information captions**

806

807 S1 Appendix. Measurement of physicochemical properties of pond water.

808

809 S2 Appendix. Statistical analysis.

810

811 S1 Fig. Changes of insecticide concentrations in studied ponds. In each panel, red, blue, and  
812 green indicate the top 3 ponds with the highest detected concentrations among the 21 ponds. The  
813 others are colored gray. Each point connecting line segments indicates one of the seven  
814 samplings during the study period.

815

816 S2 Fig. Changes of fungicide concentrations in studied ponds. The plotting was done as in S1  
817 Fig. Among the 13 fungicides measured, TPN is not shown because it was not detected in any  
818 pond.

819

820 S3 Fig. Changes of herbicide concentrations in studied ponds. The plotting was done as in S1

821 Fig.

822

823

824 S1 Table. Sampled animals.

825

826 S2 Table. Taxonomic richness (number of lowest possible taxa) of sampled animals in studied

827 ponds.

828

829 S3 Table. Chosen methods for pesticide extraction and measurement.

830

831 S4 Table. Measured environmental variables (water qualities).

832

833 S5 Table. Measured pesticide concentrations.

834

835 S6 Table. Environmental variables (water qualities) in studied ponds. Mean values are based on

836 seven measurements taken during the study period. Among the 31 pesticides measured, only

837 BPMC (insecticide) and probenazole (fungicide) are shown. For the detected concentrations of

838 all pesticides, see S5 Table.

839

840 S7 Table. Environmental variables (other than water qualities) in studied ponds.

841

842 S8 Table. Measured environmental variables (other than water qualities).

843

844 S9 Table. Calculated *p*-values (statistical significance) for effects of statistically contributive

845 explanatory variables. See S2 Appendix 2 for the algorithm and S2 Appendix 5 for the best

846 models.

847

(a) Large insects

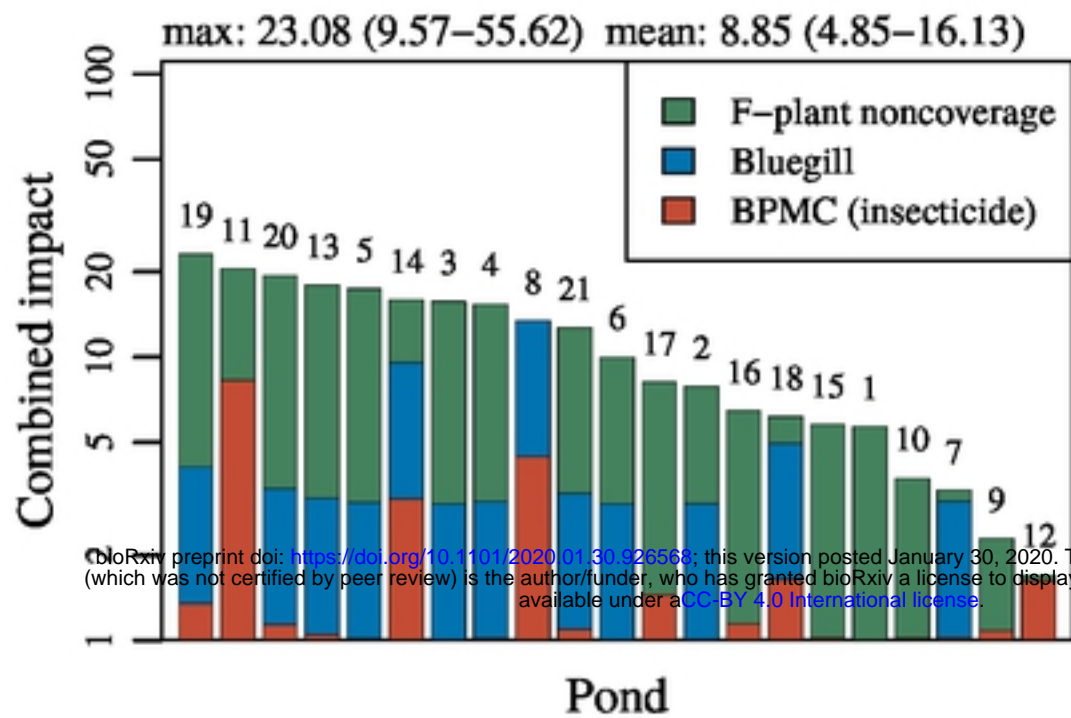

(b) Lartige insects (interaction)

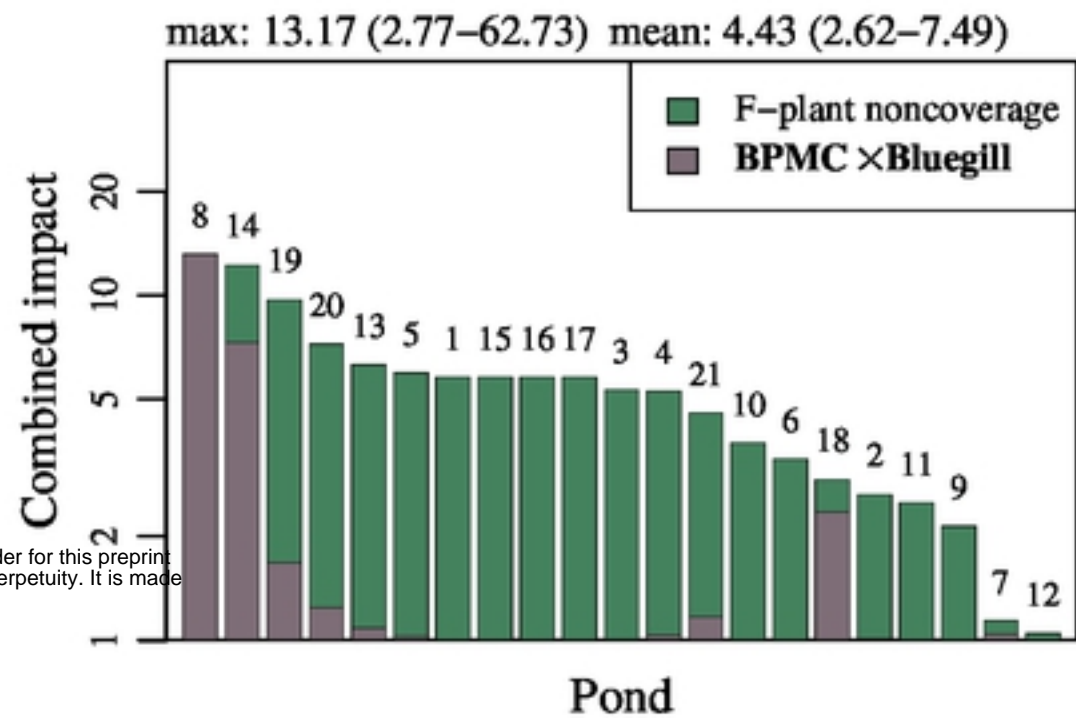

(c) Large animals

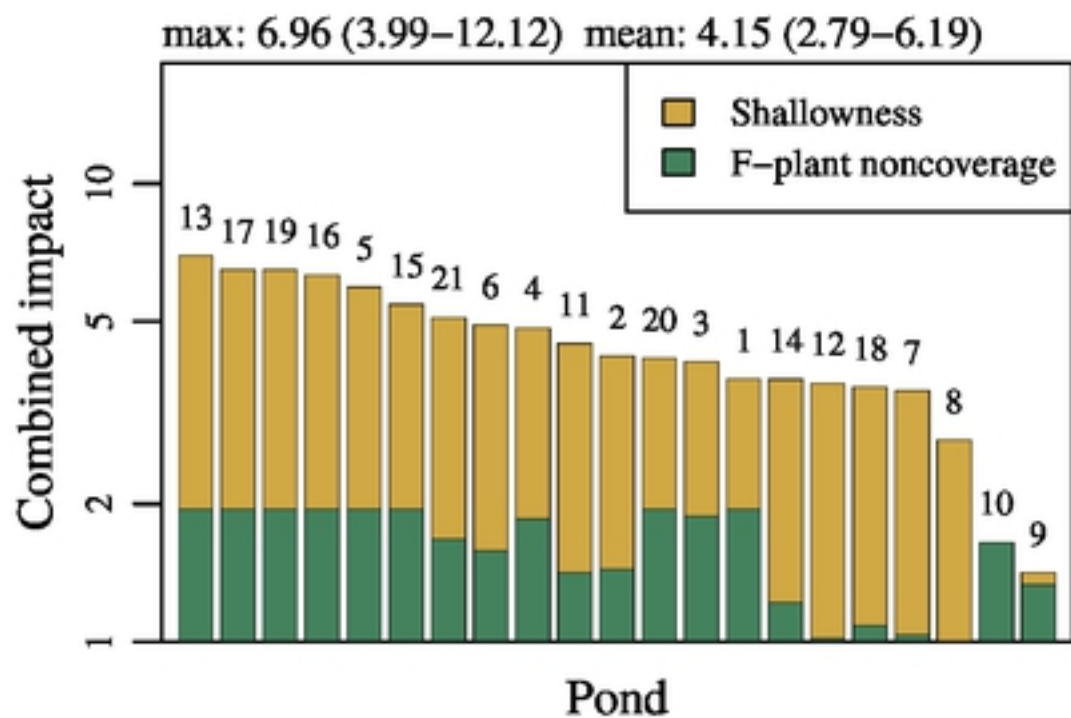

(d) Small animals

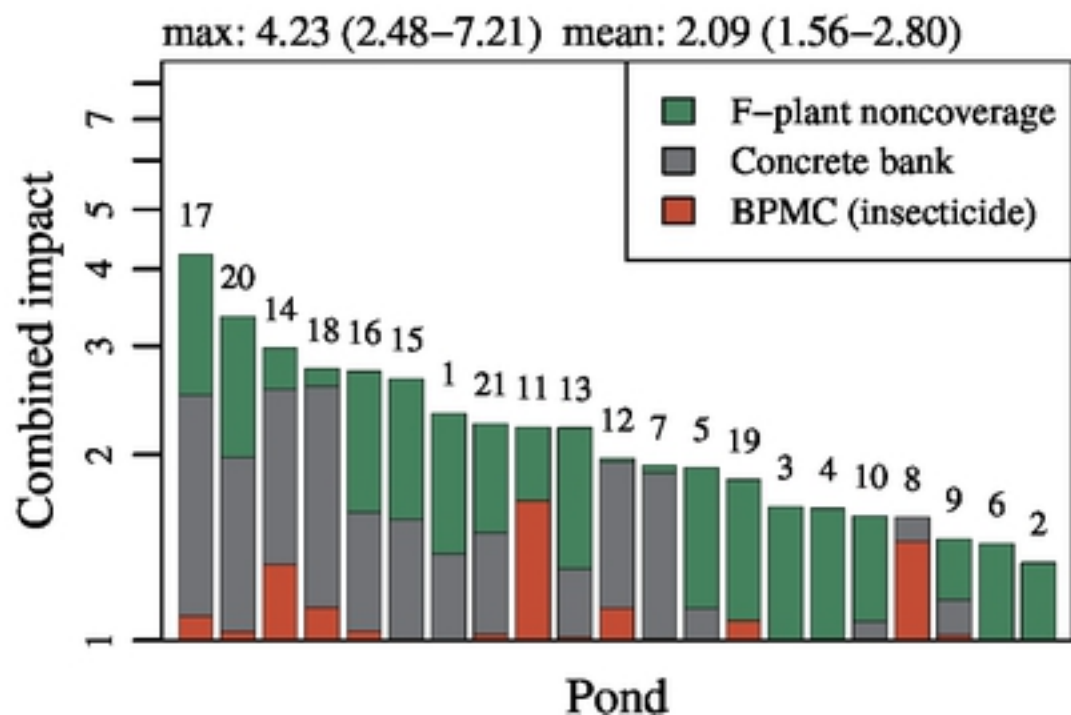

(e) Small animals (interaction)

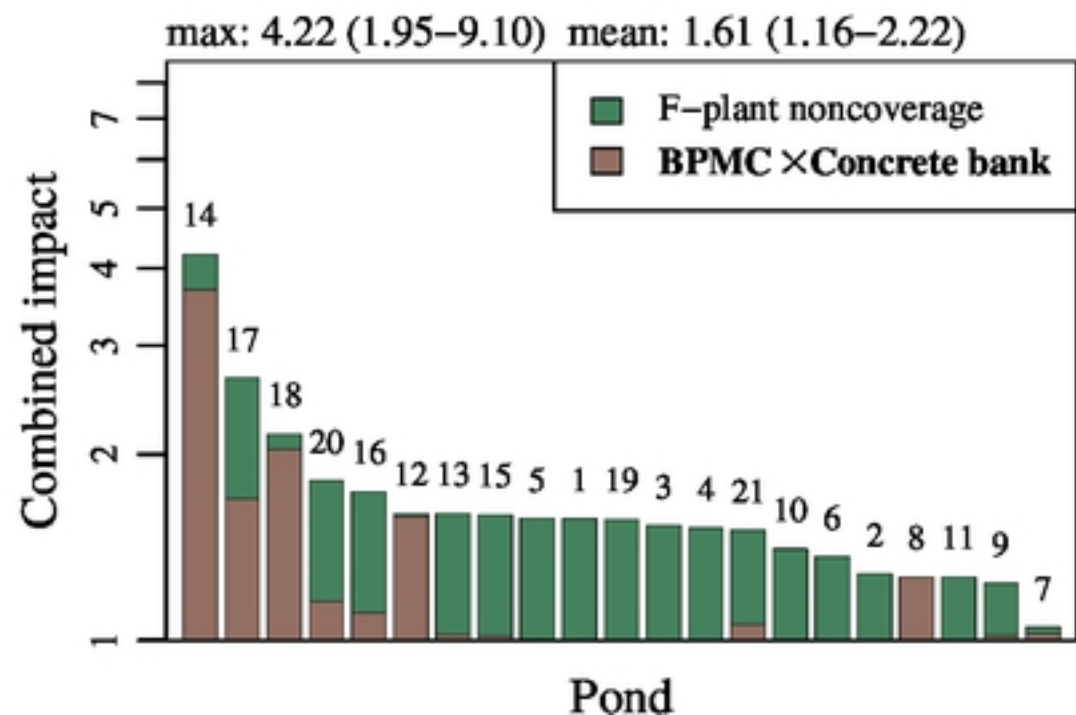

Taxonomic richness

70  
60  
50  
40  
30  
20  
10

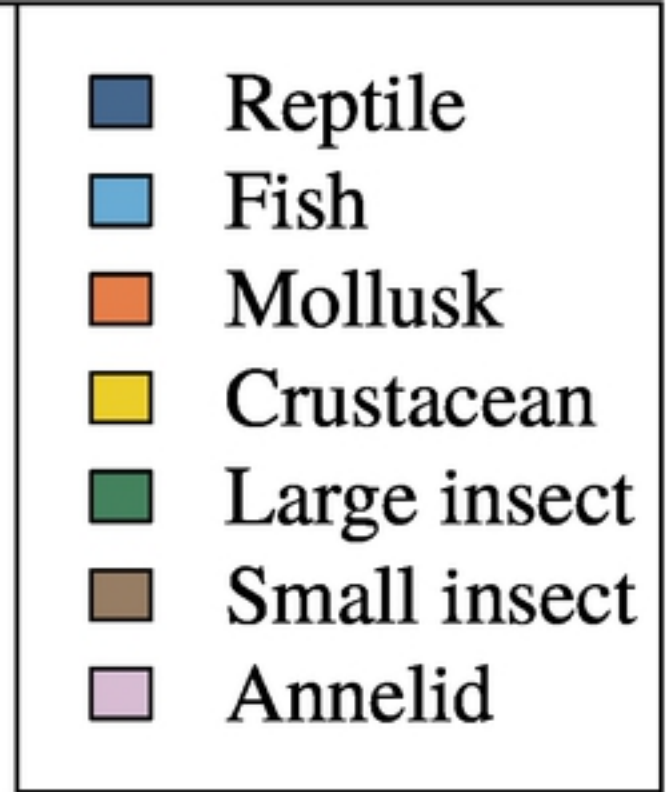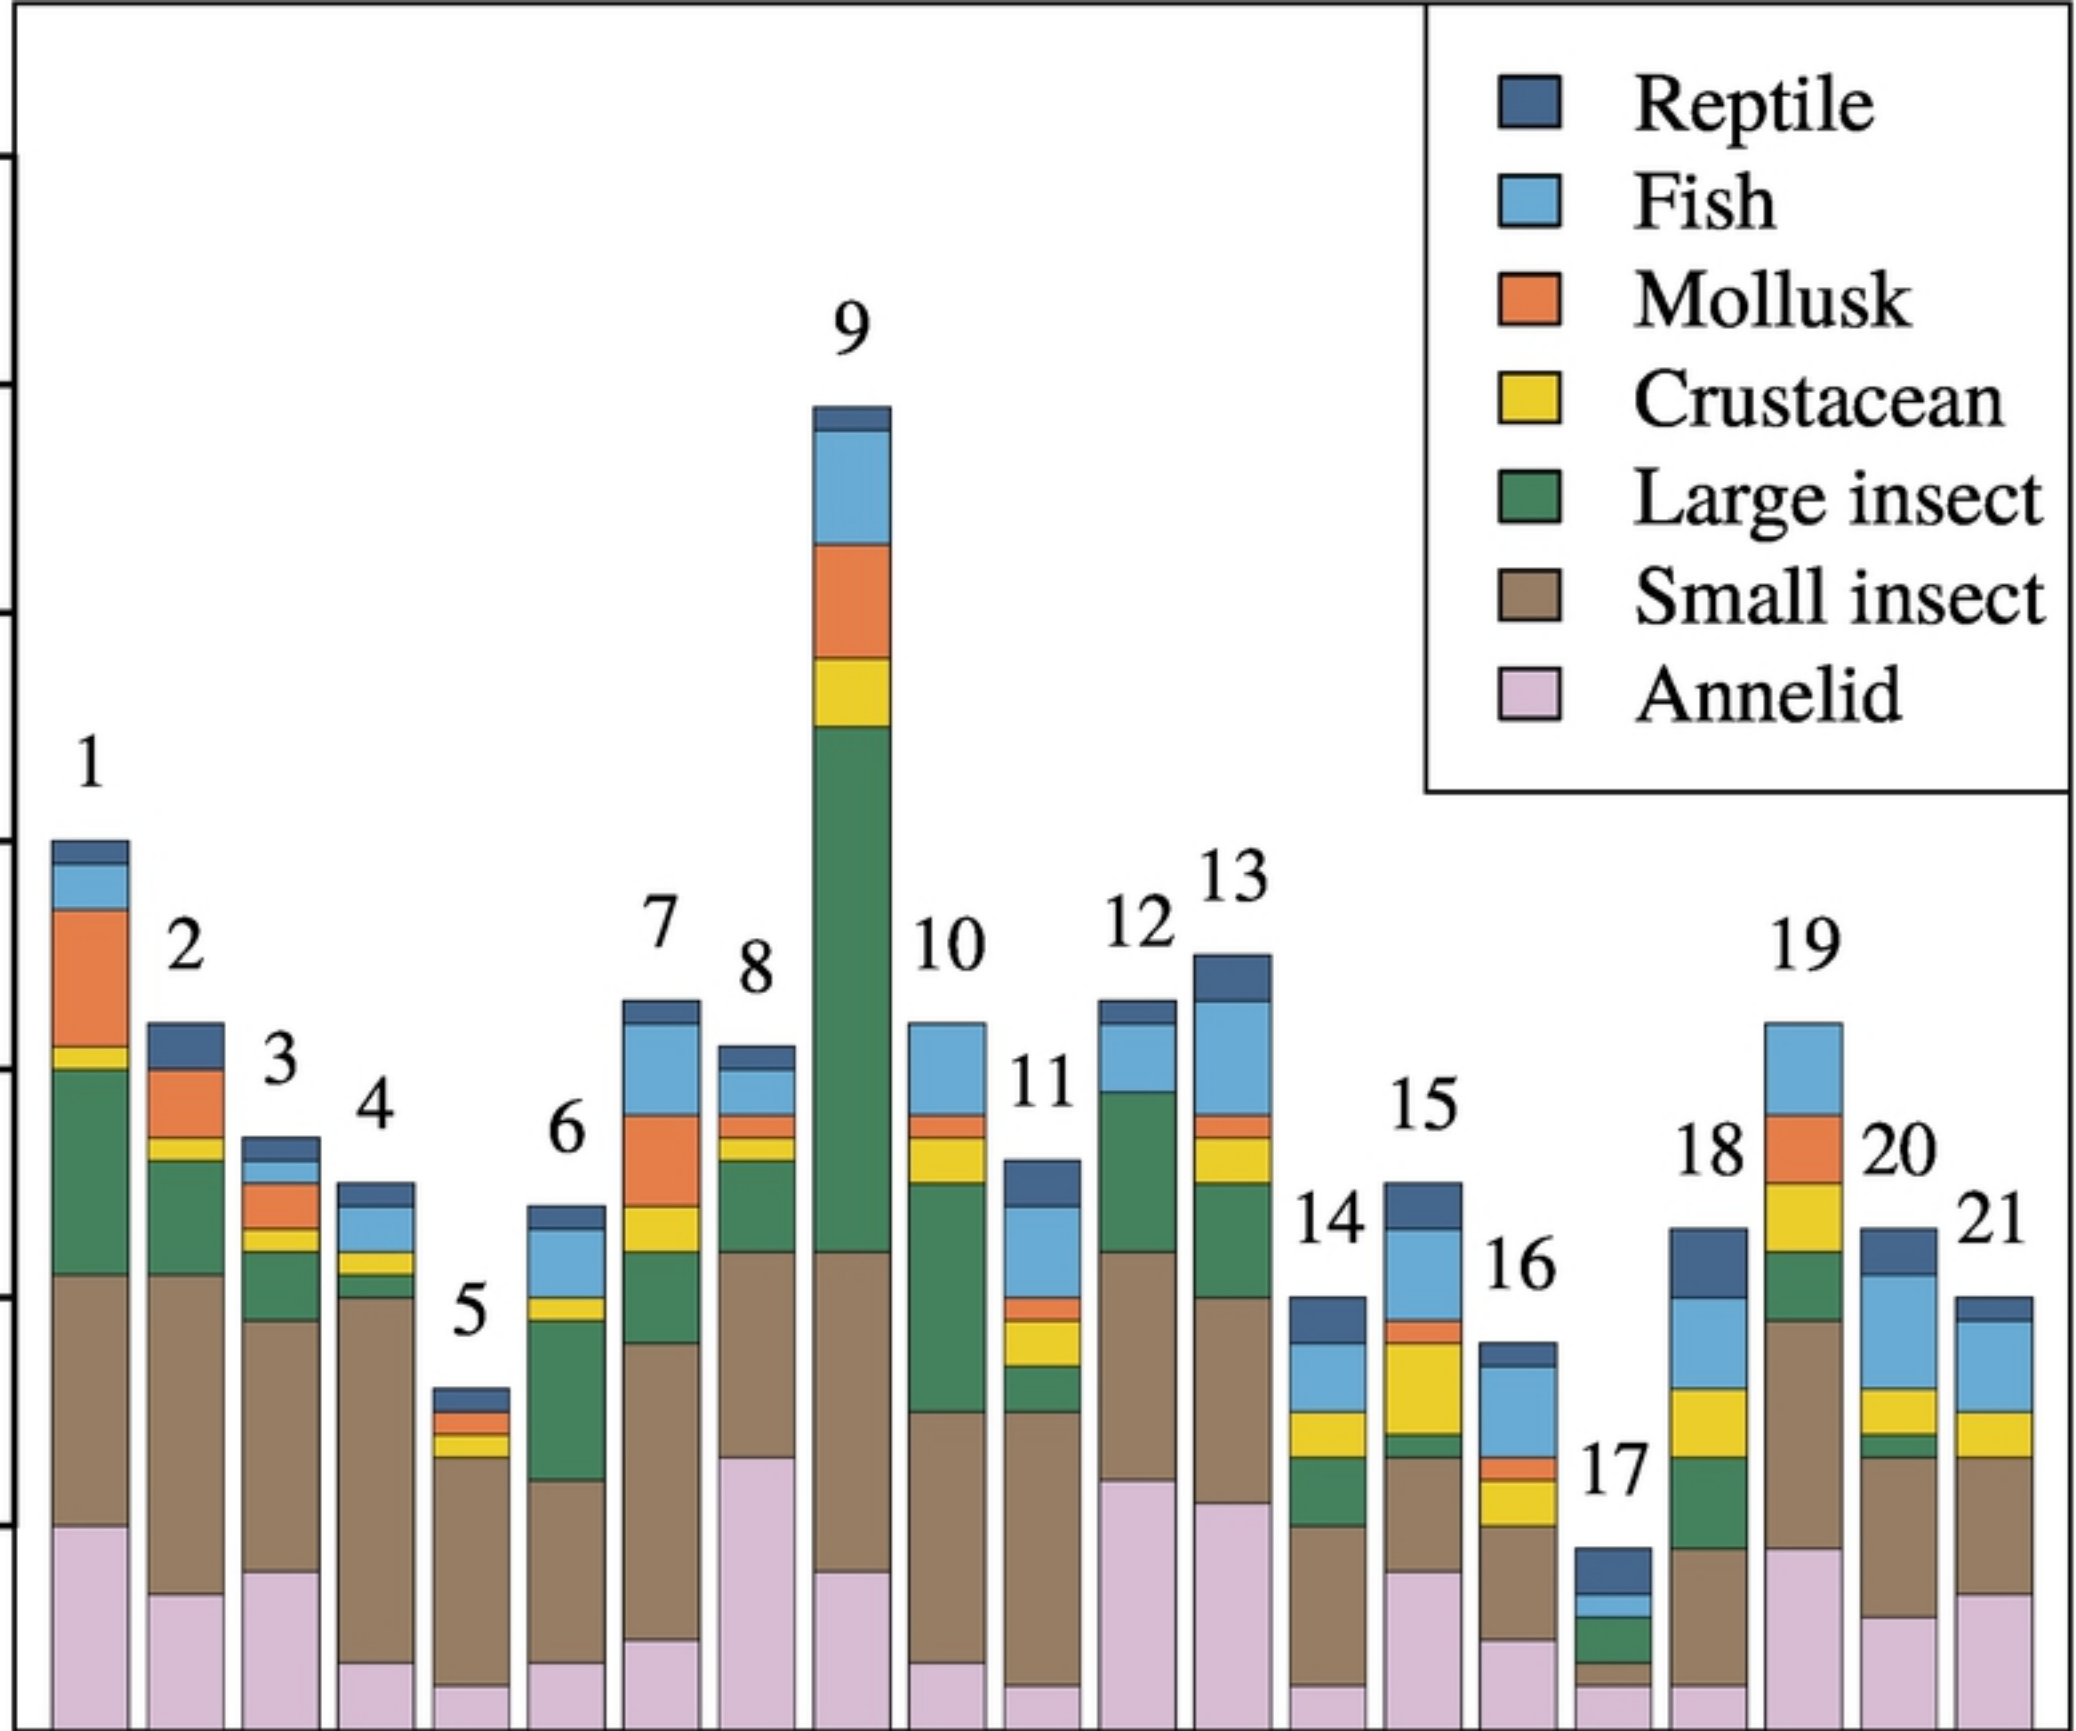

Pond



(a) All sampled

**Shallowness**

max : 1.84 (1.36–2.49)  
mean: 1.59 (1.26–2.00)

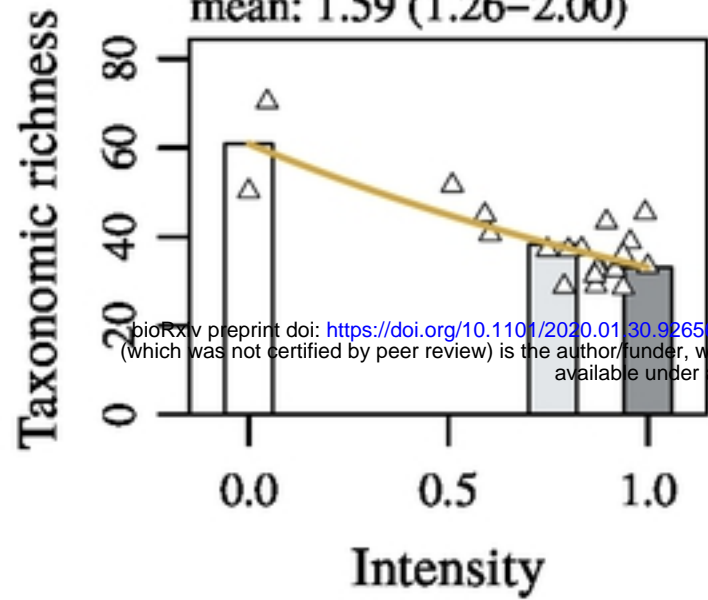

**F-plant noncoverage \***

max : 1.71 (1.31–2.24)  
mean: 1.43 (1.20–1.72)

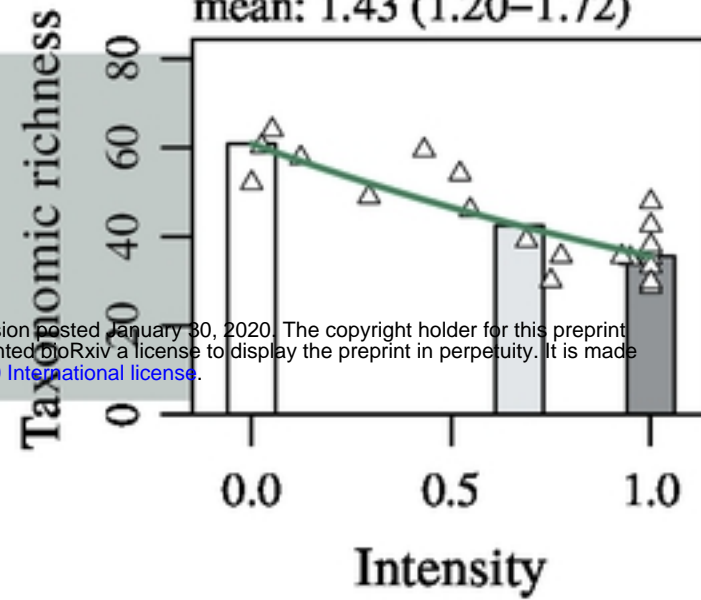

bioRxiv preprint doi: <https://doi.org/10.1101/2020.01.30.926568>; this version posted January 30, 2020. The copyright holder for this preprint (which was not certified by peer review) is the author/funder, who has granted bioRxiv a license to display the preprint in perpetuity. It is made available under aCC-BY 4.0 International license.

(b) Fishes

**Probenazole (fungicide) \***

max : 2.80 (0.98–8.05)  
mean: 1.32 (0.99–1.74)

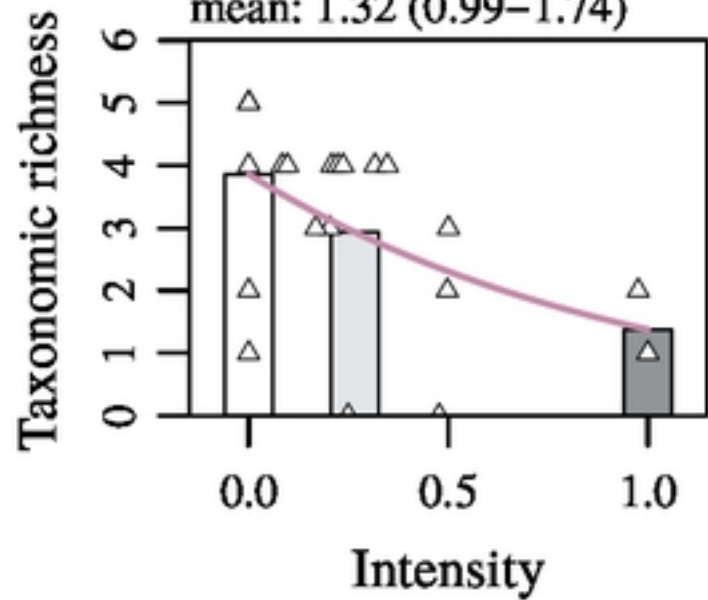

(c) Small insects

**Concrete bank \***

max : 2.11 (1.32–3.36)  
mean: 1.31 (1.11–1.56)

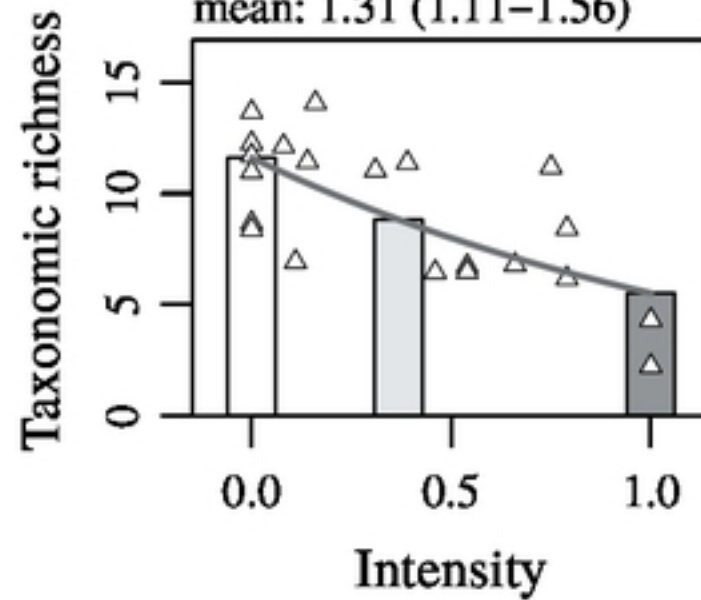

(d) Large insects

**BPMC (insecticide) \***

max : 8.29 (2.37–28.98)  
mean: 1.40 (1.15–1.70)

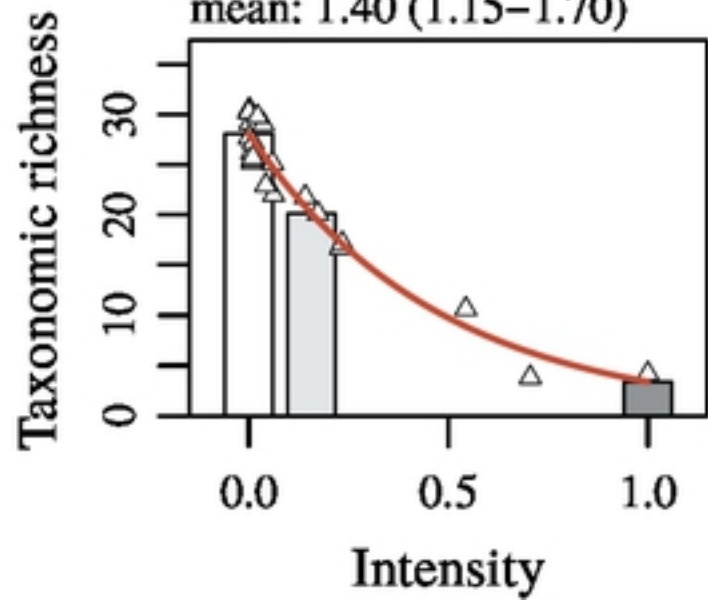

**F-plant noncoverage \***

max : 5.65 (2.67–11.96)  
mean: 3.20 (1.93–5.28)

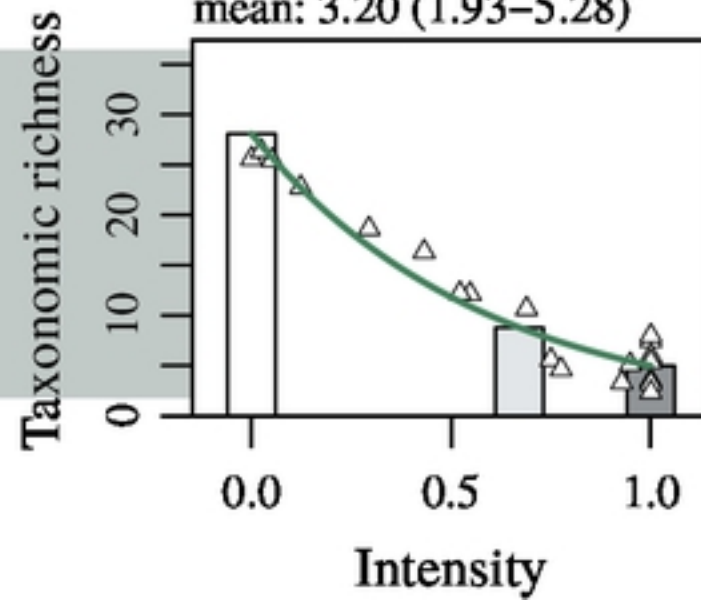

**Bluegill \***

max : 3.02 (1.98–4.63)  
mean: 1.98 (1.52–2.58)

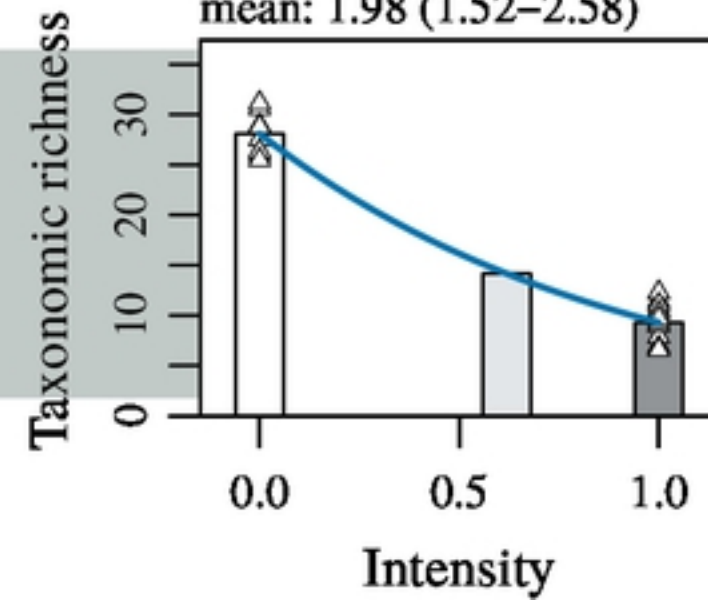

## (a) Large animals

### Shallowness \*

max : 3.61 (2.45–5.31)

mean: 2.66 (1.98–3.57)

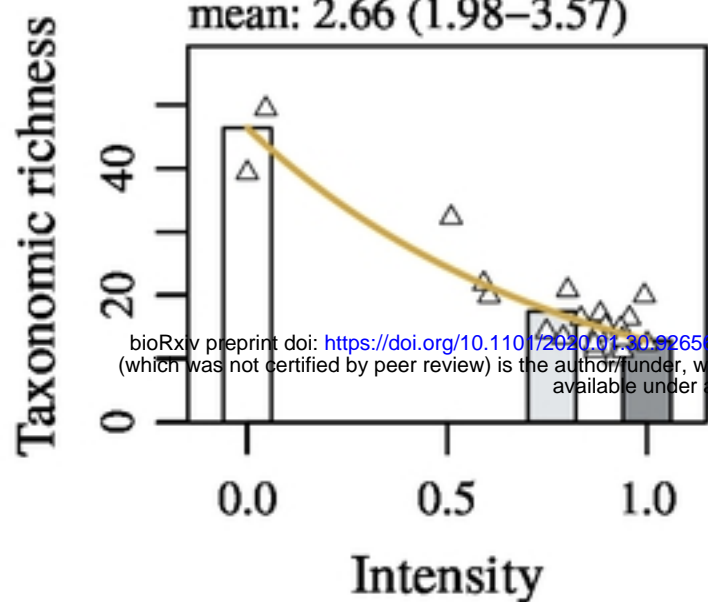

### F-plant noncoverage \*

max : 1.95 (1.30–2.90)

mean: 1.56 (1.20–2.04)

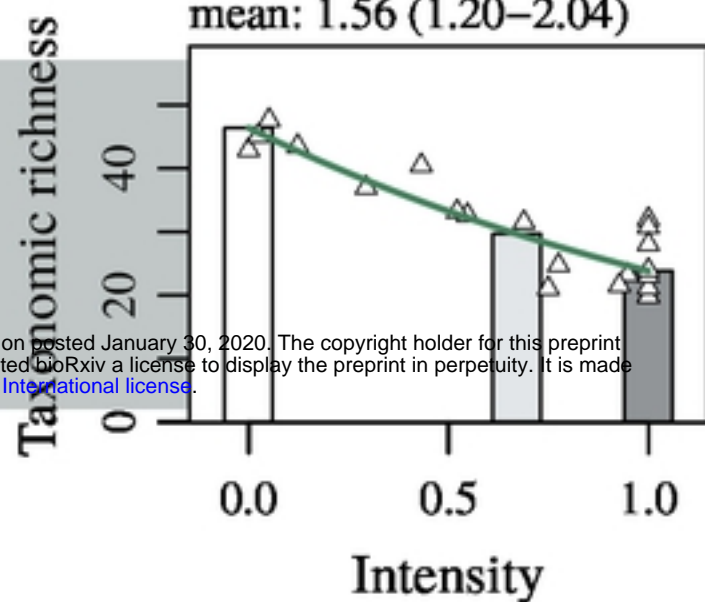

bioRxiv preprint doi: <https://doi.org/10.1101/2020.01.30.926568>; this version posted January 30, 2020. The copyright holder for this preprint (which was not certified by peer review) is the author/funder, who has granted bioRxiv a license to display the preprint in perpetuity. It is made available under aCC-BY 4.0 International license.

## (b) Small animals

### BPMC (insecticide) \*

max : 1.68 (1.01–2.80)

mean: 1.09 (1.00–1.18)

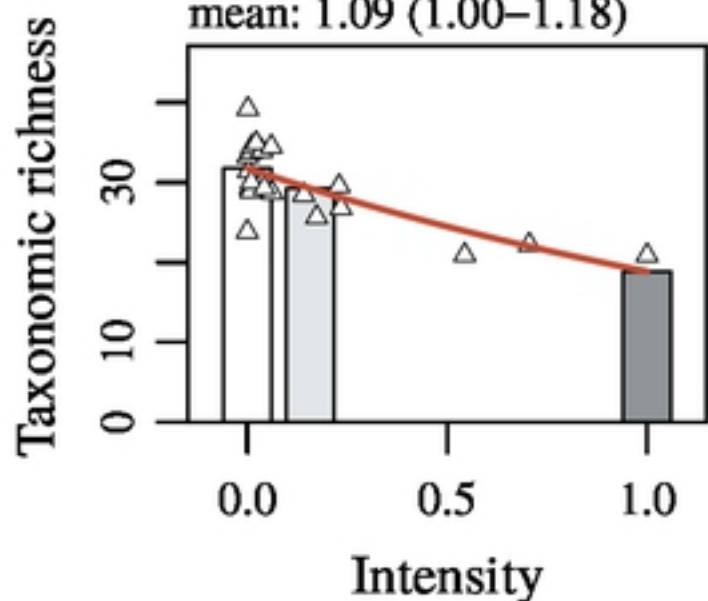

### F-plant noncoverage \*

max : 1.69 (1.18–2.42)

mean: 1.42 (1.12–1.81)

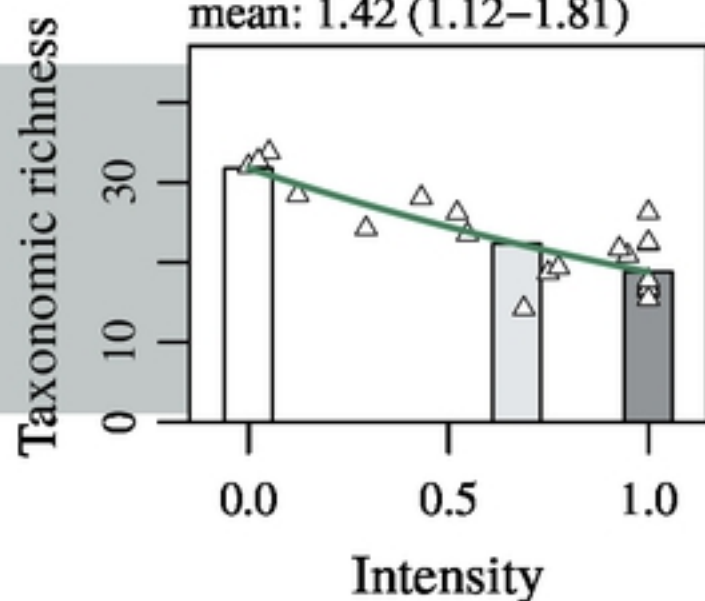

### Concrete bank \*

max : 2.28 (1.55–3.36)

mean: 1.35 (1.18–1.56)

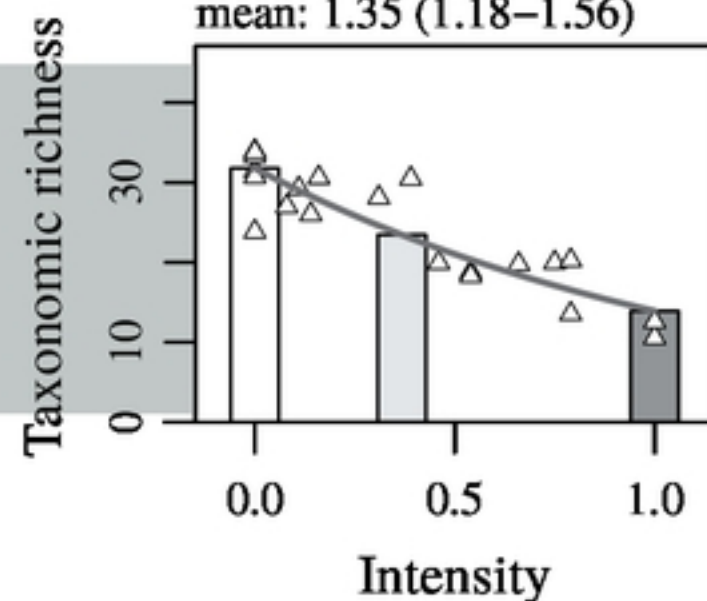

## (c) Invertebrates

### BPMC (insecticide)

max : 2.03 (1.26–3.26)

mean: 1.12 (1.04–1.20)

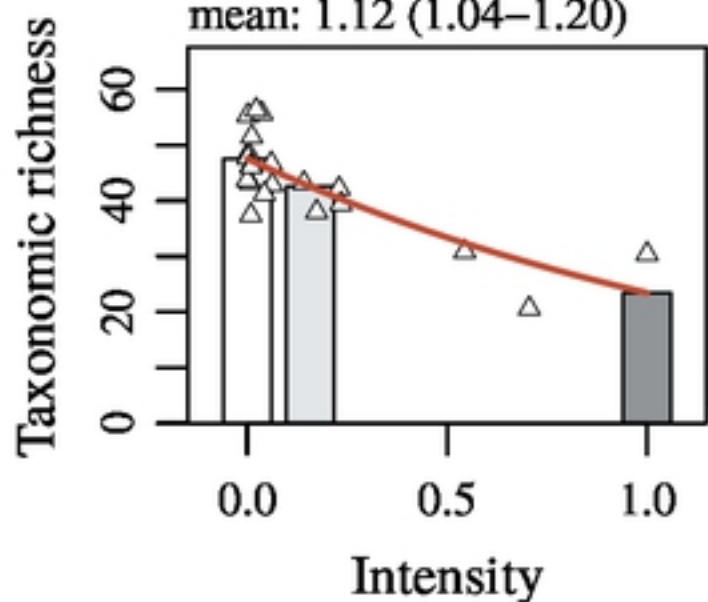

### F-plant noncoverage \*

max : 1.96 (1.45–2.64)

mean: 1.57 (1.28–1.92)

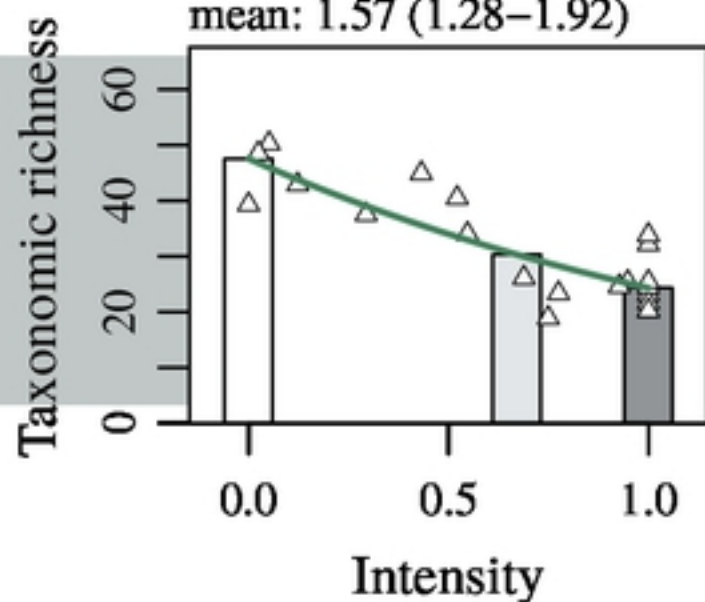

### Concrete bank

max : 1.78 (1.26–2.50)

mean: 1.24 (1.09–1.40)

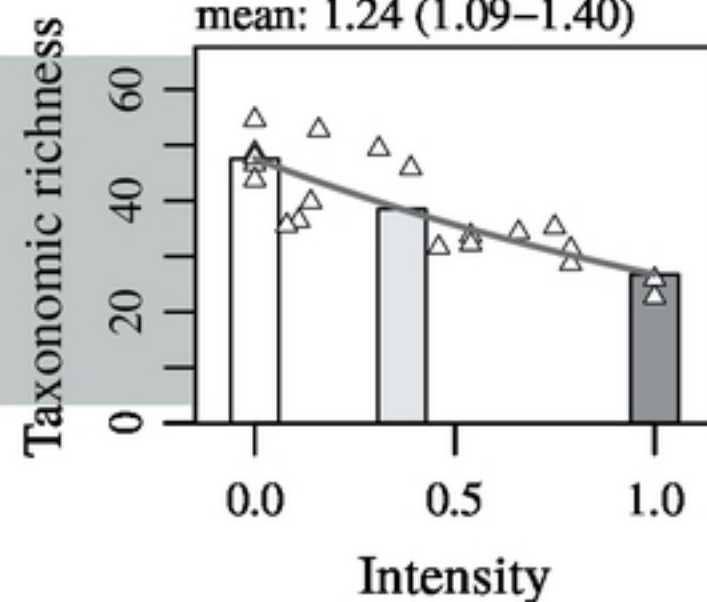

## (a) Large insects

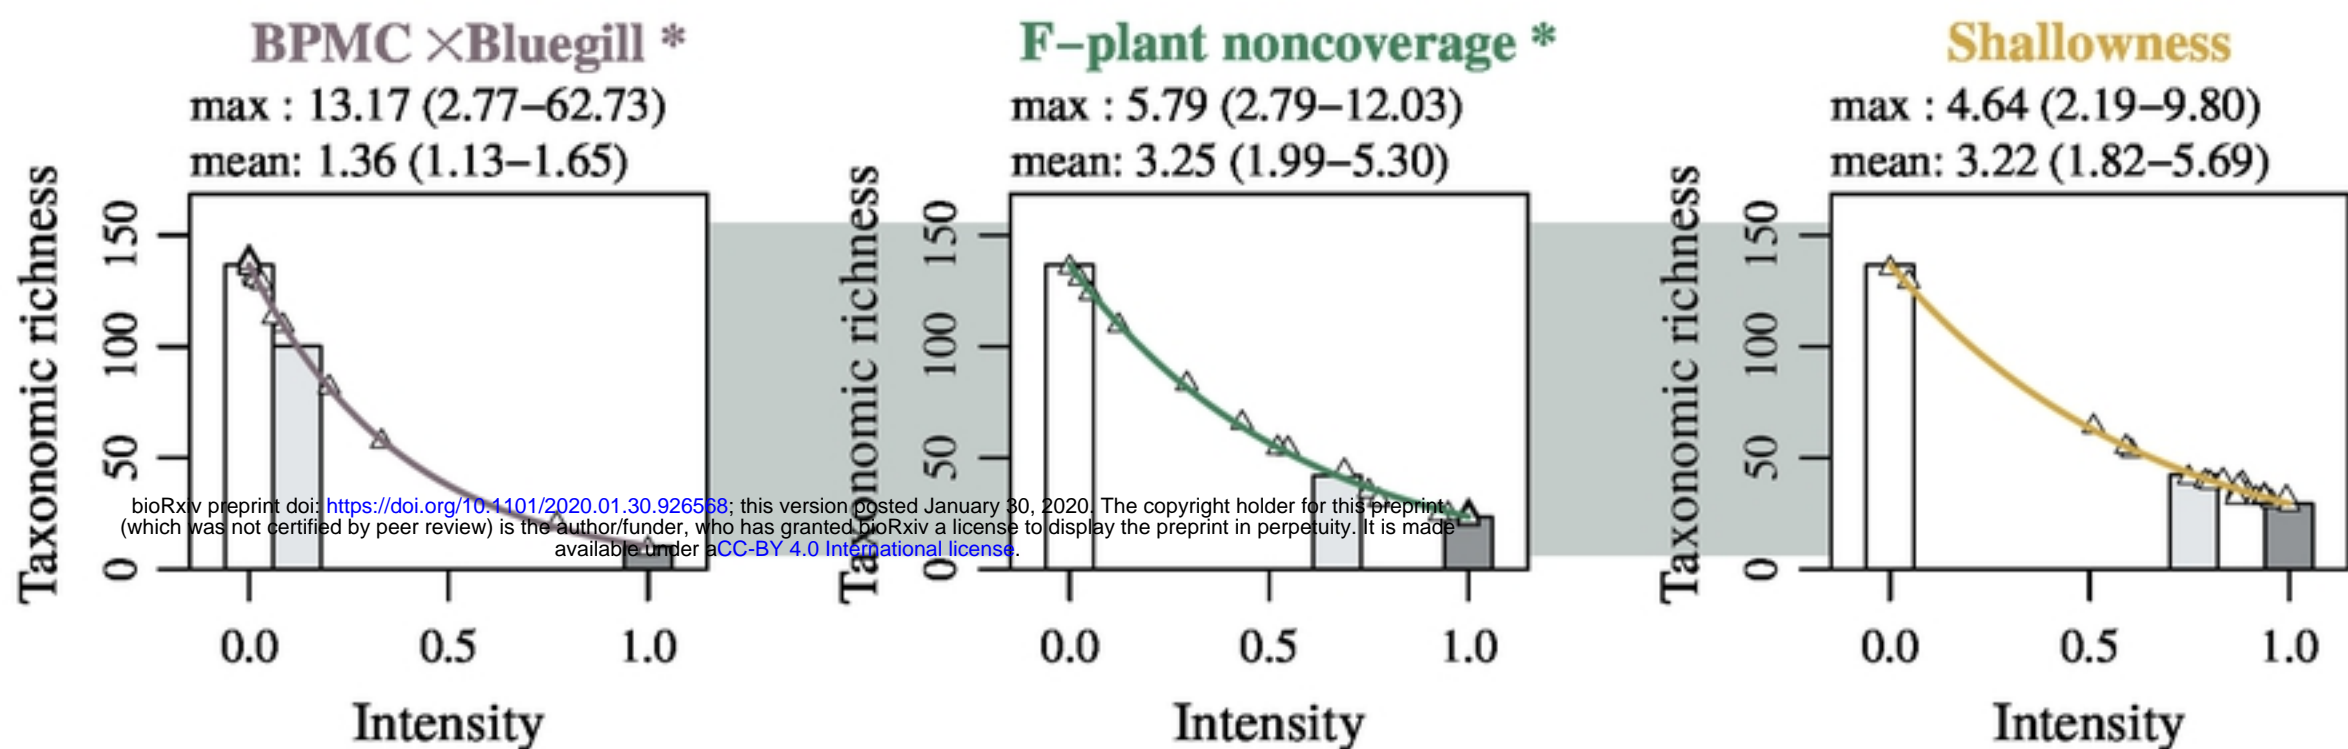

## (b) Small animals

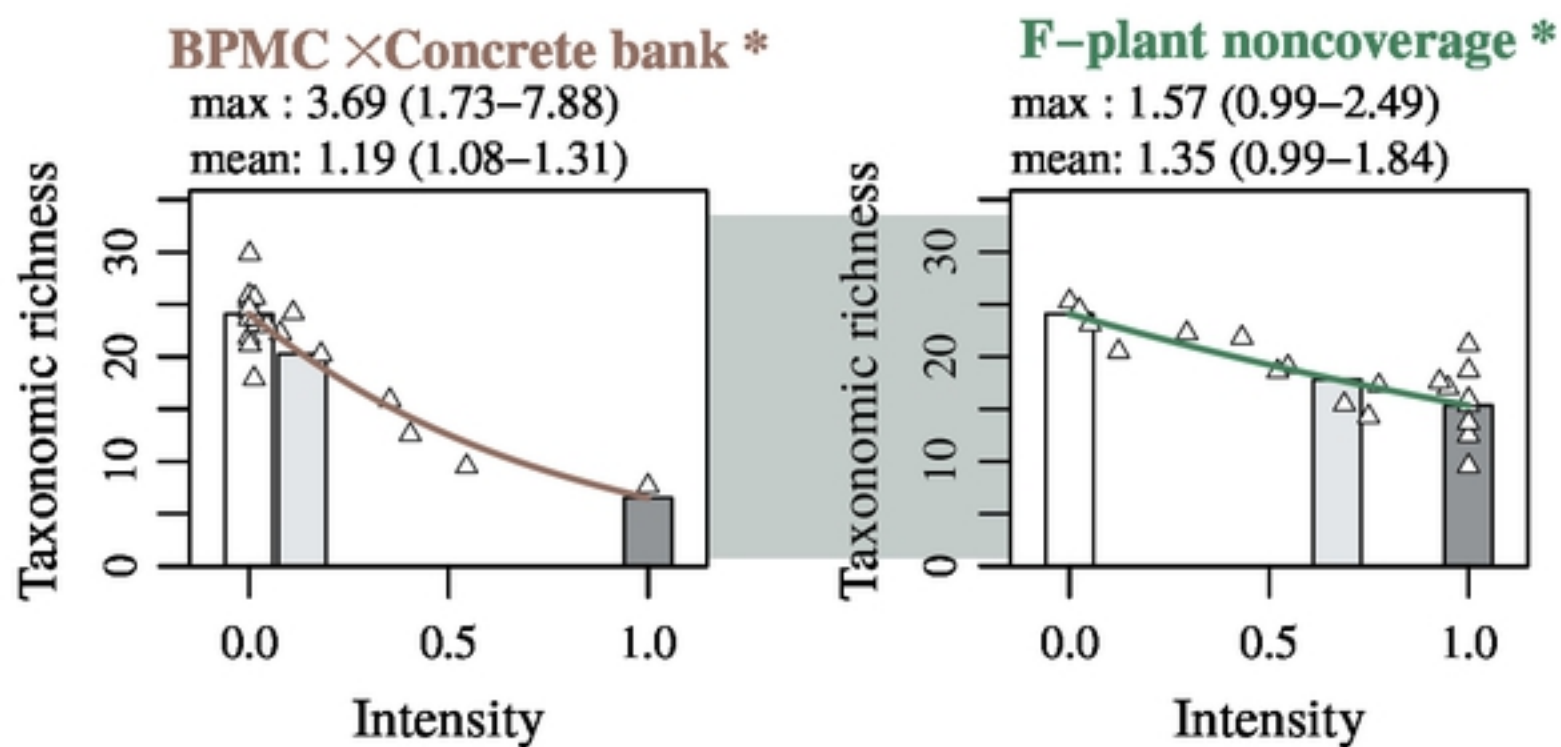

## (c) Invertebrates

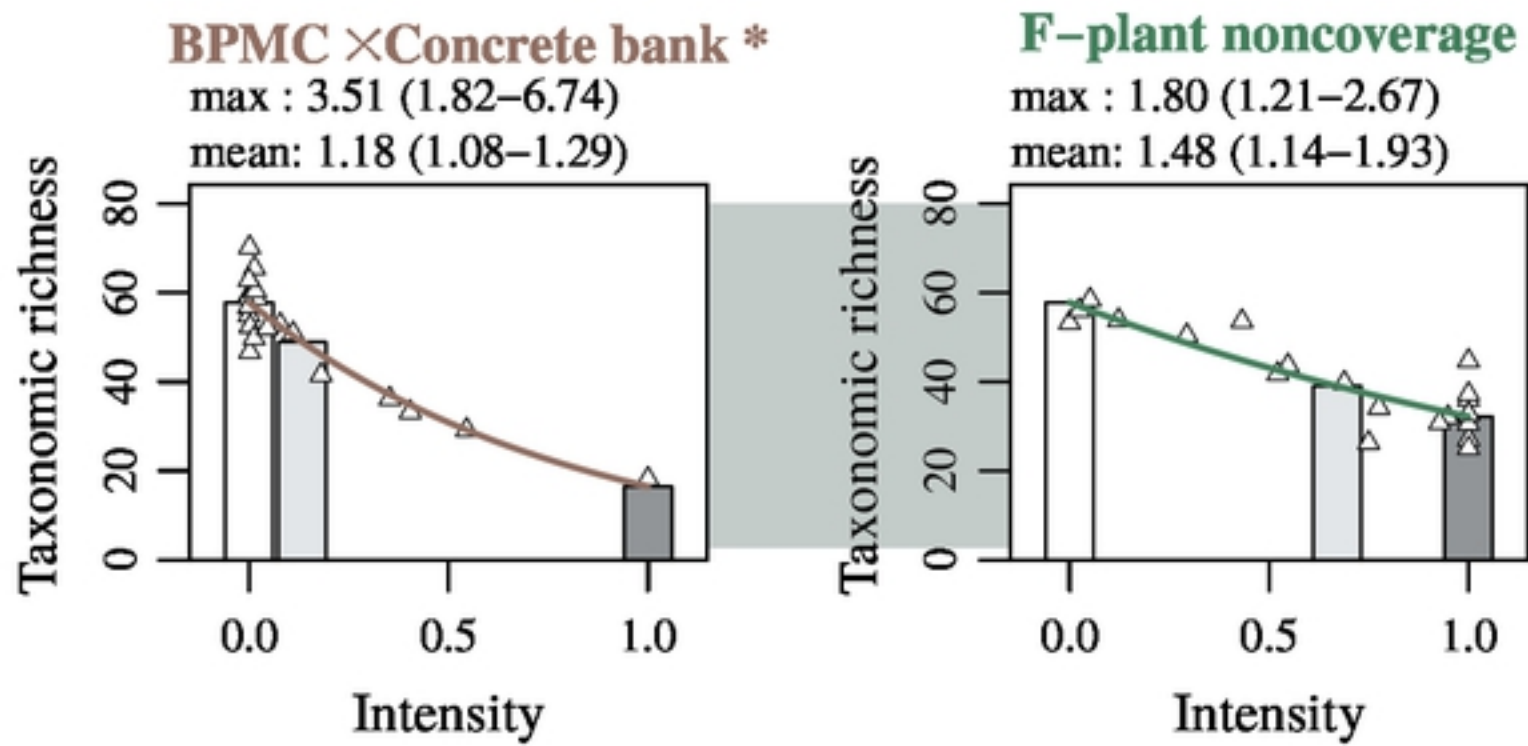

Source: https://www.biorxiv.org/content/10.1101/2020.01.30.926568v1.full.pdf
